# Supplementary material
Source: Royal Society of Chemistry journal article supplement (doi:10.1039/d6nr00249h)
Supplement: d6nr00249h1.xlsx [file d6nr00249h1.xlsx]

## Sheet: Metrics
Name:	Zeta potential values for liposomes.
Made by:	Kamila Jarzyńska
Date created:	2022-07-01
Last modification:	2025-04-24
Comments:

## Sheet: ZETA POTENTIAL OF LIPOSOMES
No.	Article	Liposome composition	Preparation method	Sonication time [min]	Extrusion pore size [nm]	Lamellarity (size)	Size [nm]	Size measurement method	Charge	Molar fractions [%mol]	Cholesterol	Other stabilizers	Protein	Protein concentration [μg/mL]	Enzymatic reaction time [min]	Coating	Coating concentration [μg/mL]	Lipid:coating molar ratio	Active substance	Lipid:drug molar ratio	Active substance concentration [μg/mL]	Zeta potential [mV]	ZP measurement method	Time after dilution [h]	Polydispersity index	Polydispersity index measurement method	pH	Temperature [°C]	Encapsulation efficiency [%]	Drug loading [%]
1	Smith et al., 2017, Anal Bioanal Chem	﻿DSPC/Chol/DOTAP	TLE, microfluidization			Small unilamellar (SUV, 20-100 nm)	85	DLS	Cationic	﻿58.2 / 34.6 / 7.5	Yes								None			34	PALS				7.4-7.7	25
1	Smith et al., 2017, Anal Bioanal Chem	﻿DSPC/Chol/DOTAP	TLE, microfluidization			Small unilamellar (SUV, 20-100 nm)	80	DLS	Cationic	﻿56.6 / 37.5 / 5.9	Yes								None			25	PALS				7.4-7.7	25
1	Smith et al., 2017, Anal Bioanal Chem	﻿DSPC/Chol/DOTAP	TLE, microfluidization			Small unilamellar (SUV, 20-100 nm)	98	DLS	Cationic	﻿60.6 / 34.4 / 5.0	Yes								None			25	PALS				7.4-7.7	25
1	Smith et al., 2017, Anal Bioanal Chem	﻿DSPC/Chol/DOTAP	TLE, microfluidization			Small unilamellar (SUV, 20-100 nm)	96	DLS	Cationic	﻿59.3 / 36.1 / 4.6	Yes								None			26	PALS				7.4-7.7	25
1	Smith et al., 2017, Anal Bioanal Chem	﻿DSPC/Chol/DOTAP	TLE, microfluidization			Small unilamellar (SUV, 20-100 nm)	77	DLS	Cationic	﻿57.5 / 39.1 / 3.4	Yes								None			14	PALS				7.4-7.7	25
1	Smith et al., 2017, Anal Bioanal Chem	﻿DSPC/Chol/DOTAP	TLE, microfluidization			Small unilamellar (SUV, 20-100 nm)	73	DLS	Cationic	﻿60.7 / 36.1 / 3.2	Yes								None			15	PALS				7.4-7.7	25
1	Smith et al., 2017, Anal Bioanal Chem	﻿DSPC/Chol/DOTAP	TLE, microfluidization			Small unilamellar (SUV, 20-100 nm)	75	DLS	Cationic	﻿61.7 / 35.5 / 2.8	Yes								None			14	PALS				7.4-7.7	25
1	Smith et al., 2017, Anal Bioanal Chem	﻿DSPC/Chol/DOTAP	TLE, microfluidization			Small unilamellar (SUV, 20-100 nm)	97	DLS	Cationic	﻿61.5 / 36.3 / 2.2	Yes								None			11	PALS				7.4-7.7	25
1	Smith et al., 2017, Anal Bioanal Chem	DSPC/Chol/LP	TLE, microfluidization			Small unilamellar (SUV, 20-100 nm)	105	DLS	Neutral	﻿61.5 / 38.4 / 0.2	Yes								None			-9	PALS				7.4-7.7	25
1	Smith et al., 2017, Anal Bioanal Chem	DSPC/Chol/LP	TLE, microfluidization			Small unilamellar (SUV, 20-100 nm)	85	DLS	Neutral	﻿57.7 / 40.2 / 2.1	Yes								None			-10	PALS				7.4-7.7	25
1	Smith et al., 2017, Anal Bioanal Chem	DSPC/Chol/LP	TLE, microfluidization			Small unilamellar (SUV, 20-100 nm)	97	DLS	Neutral	﻿62.7 / 34.2 / 3.1	Yes								None			-9	PALS				7.4-7.7	25
1	Smith et al., 2017, Anal Bioanal Chem	DSPC/Chol/LP	TLE, microfluidization			Small unilamellar (SUV, 20-100 nm)	109	DLS	Neutral	﻿55.2 / 34.4 / 10.4	Yes								None			-11	PALS				7.4-7.7	25
1	Smith et al., 2017, Anal Bioanal Chem	DSPC/Chol/DOPS	TLE, microfluidization			Small unilamellar (SUV, 20-100 nm)	70	DLS	Anionic	﻿61.7 / 35.1 / 3.2	Yes								None			-27	PALS				7.4-7.7	25
1	Smith et al., 2017, Anal Bioanal Chem	DSPC/Chol/DOPS	TLE, microfluidization			Small unilamellar (SUV, 20-100 nm)	92	DLS	Anionic	﻿62.3 / 34.0 / 3.7	Yes								None			-23	PALS				7.4-7.7	25
1	Smith et al., 2017, Anal Bioanal Chem	DSPC/Chol/DOPS	TLE, microfluidization			Small unilamellar (SUV, 20-100 nm)	90	DLS	Anionic	﻿54.6 / 39.6 / 5.8	Yes								None			-35	PALS				7.4-7.7	25
1	Smith et al., 2017, Anal Bioanal Chem	DSPC/Chol/DOPS	TLE, microfluidization			Small unilamellar (SUV, 20-100 nm)	68	DLS	Anionic	﻿61.8 / 31.3 / 6.9	Yes								None			-45	PALS				7.4-7.7	25
1	Smith et al., 2017, Anal Bioanal Chem	DSPC/Chol/DOPS	TLE, microfluidization			Small unilamellar (SUV, 20-100 nm)	86	DLS	Anionic	﻿55.2 / 35.7 / 9.1	Yes								None			-45	PALS				7.4-7.7	25
1	Smith et al., 2017, Anal Bioanal Chem	DSPC/Chol/LP/DOTAP	TLE, microfluidization			Small unilamellar (SUV, 20-100 nm)	91	DLS	Cationic	﻿59.6 / 33.1 / 0.2 / 7.1	Yes								None			31	PALS				7.4-7.7	25
1	Smith et al., 2017, Anal Bioanal Chem	DSPC/Chol/LP/DOTAP	TLE, microfluidization			Small unilamellar (SUV, 20-100 nm)	94	DLS	Cationic	﻿54.8 / 38.0 / 0.4 / 6.8	Yes								None			26	PALS				7.4-7.7	25
1	Smith et al., 2017, Anal Bioanal Chem	DSPC/Chol/LP/DOTAP	TLE, microfluidization			Small unilamellar (SUV, 20-100 nm)	84	DLS	Cationic	﻿56.3 / 34.8 / 1.6 / 7.4	Yes								None			5	PALS				7.4-7.7	25
1	Smith et al., 2017, Anal Bioanal Chem	DSPC/Chol/LP/DOPS	TLE, microfluidization			Small unilamellar (SUV, 20-100 nm)	78	DLS	Anionic	﻿58.3 / 34.1 / 0.2 / 7.4	Yes								None			-38	PALS				7.4-7.7	25
1	Smith et al., 2017, Anal Bioanal Chem	DSPC/Chol/LP/DOPS	TLE, microfluidization			Small unilamellar (SUV, 20-100 nm)	83	DLS	Anionic	﻿57.6 / 33.3 / 1.9 / 7.3	Yes								None			-15	PALS				7.4-7.7	25
2	Awad et al., 2005, Journal of Organometallic Chemistry	DODAB	Sonication, extrusion			No information			Cationic	1	No								BSH	7:100	109.936	-31	ELS				7.4
2	Awad et al., 2005, Journal of Organometallic Chemistry	DODAB	Sonication, extrusion			No information			Cationic	1	No								None			43.7	ELS				7.4
2	Awad et al., 2005, Journal of Organometallic Chemistry	DODAB	Sonication, extrusion			No information			Cationic	1	No								BSH	14:100	109.936	-36.9	ELS				7.4
2	Awad et al., 2005, Journal of Organometallic Chemistry	DODAB	Sonication, extrusion			No information			Cationic	1	No								BSH	14:100	219.872	-43.8	ELS				7.4
2	Awad et al., 2005, Journal of Organometallic Chemistry	DODAB	Sonication, extrusion			No information			Cationic	1	No								None			56	ELS				7.4
2	Awad et al., 2005, Journal of Organometallic Chemistry	DODAB	Sonication, extrusion			No information			Cationic	1	No								BSH	4:10	109.936	-34.2	ELS				7.4
2	Awad et al., 2005, Journal of Organometallic Chemistry	DODAB	Sonication, extrusion			No information			Cationic	1	No								BSH	1:2	219.872	-48.1	ELS				7.4
2	Awad et al., 2005, Journal of Organometallic Chemistry	DODAB/DOPE	Sonication, extrusion			No information			Cationic	50 / 50	No								None			48	ELS				7.4
2	Awad et al., 2005, Journal of Organometallic Chemistry	DODAB/DOPE	Sonication, extrusion			No information			Cationic	50 / 50	No								BSH	2:10	153.91	-9.8	ELS				7.4
2	Awad et al., 2005, Journal of Organometallic Chemistry	DODAB/DOPC	Sonication, extrusion			No information			Cationic	50 / 50	No								None			57.2	ELS				7.4
2	Awad et al., 2005, Journal of Organometallic Chemistry	DODAB/DOPC	Sonication, extrusion			No information			Cationic	50 / 50	No								BSH	2:10	153.91	-19.9	ELS				7.4
2	Awad et al., 2005, Journal of Organometallic Chemistry	DODAB/DOPE/DOPC	Sonication, extrusion			No information			Cationic	37.5 / 31.5 / 31.5	No								None			41.6	ELS				7.4
2	Awad et al., 2005, Journal of Organometallic Chemistry	DODAB/DOPE/DOPC	Sonication, extrusion			No information			Cationic	37.5 / 31.5 / 31.5	No								BSH	141:470	103.34	-21.5	ELS				7.4
3	Chibowski et al.., 2016, Adsorption	DPPC	TLE, extrusion			Large unilamellar vehicles (LUVs, > 100 nm)	131	DLS	Neutral	1	No								None			-56.7	ELS				6.2	20
3	Chibowski et al.., 2016, Adsorption	DPPC	TLE, extrusion			Large unilamellar vehicles (LUVs, > 100 nm)	141	DLS	Neutral	1	No		PLC enzyme	4000	1				None			-49.2	ELS				6.2	20
3	Chibowski et al.., 2016, Adsorption	DPPC	TLE, extrusion			Large unilamellar vehicles (LUVs, > 100 nm)	136	DLS	Neutral	1	No		PLC enzyme	4000	60				None			-49.7	ELS				6.2	20
3	Chibowski et al.., 2016, Adsorption	DPPC	TLE, extrusion			Large unilamellar vehicles (LUVs, > 100 nm)	160	DLS	Neutral	1	No								None			-55.5	ELS				6.2	37
3	Chibowski et al.., 2016, Adsorption	DPPC	TLE, extrusion			Large unilamellar vehicles (LUVs, > 100 nm)	156	DLS	Neutral	1	No		PLC enzyme	4000	1				None			-46	ELS				6.2	37
3	Chibowski et al.., 2016, Adsorption	DPPC	TLE, extrusion			Large unilamellar vehicles (LUVs, > 100 nm)	146	DLS	Neutral	1	No		PLC enzyme	4000	60				None			-37.2	ELS				6.2	37
3	Chibowski et al.., 2016, Adsorption	DOPC	TLE, extrusion			Large unilamellar vehicles (LUVs, > 100 nm)	158	DLS	Neutral	1	No								None			-14.5	ELS				6.2	20
3	Chibowski et al.., 2016, Adsorption	DOPC	TLE, extrusion			Large unilamellar vehicles (LUVs, > 100 nm)	155	DLS	Neutral	1	No		PLC enzyme	4000	1				None			-15	ELS				6.2	20
3	Chibowski et al.., 2016, Adsorption	DOPC	TLE, extrusion			Large unilamellar vehicles (LUVs, > 100 nm)	174	DLS	Neutral	1	No		PLC enzyme	4000	60				None			-10.9	ELS				6.2	20
3	Chibowski et al.., 2016, Adsorption	DOPC	TLE, extrusion			Large unilamellar vehicles (LUVs, > 100 nm)	169	DLS	Neutral	1	No								None			-14.5	ELS				6.2	37
3	Chibowski et al.., 2016, Adsorption	DOPC	TLE, extrusion			Large unilamellar vehicles (LUVs, > 100 nm)	174	DLS	Neutral	1	No		PLC enzyme	4000	1				None			-20.5	ELS				6.2	37
3	Chibowski et al.., 2016, Adsorption	DOPC	TLE, extrusion			Large unilamellar vehicles (LUVs, > 100 nm)	166	DLS	Neutral	1	No		PLC enzyme	4000	60				None			-23.6	ELS				6.2	37
3	Chibowski et al.., 2016, Adsorption	DPPC	TLE, extrusion			Large unilamellar vehicles (LUVs, > 100 nm)	117	DLS	Neutral	1	No								None			-10.2	ELS				8.1	20
3	Chibowski et al.., 2016, Adsorption	DPPC	TLE, extrusion			Large unilamellar vehicles (LUVs, > 100 nm)	100	DLS	Neutral	1	No		PLC enzyme	4000	1				None			-9.4	ELS				8.1	20
3	Chibowski et al.., 2016, Adsorption	DPPC	TLE, extrusion			Large unilamellar vehicles (LUVs, > 100 nm)	121	DLS	Neutral	1	No		PLC enzyme	4000	60				None			-12.3	ELS				8.1	20
3	Chibowski et al.., 2016, Adsorption	DPPC	TLE, extrusion			Large unilamellar vehicles (LUVs, > 100 nm)	139	DLS	Neutral	1	No								None			-1.9	ELS				8.1	37
3	Chibowski et al.., 2016, Adsorption	DPPC	TLE, extrusion			Large unilamellar vehicles (LUVs, > 100 nm)	124	DLS	Neutral	1	No		PLC enzyme	4000	1				None			-1.8	ELS				8.1	37
3	Chibowski et al.., 2016, Adsorption	DPPC	TLE, extrusion			Large unilamellar vehicles (LUVs, > 100 nm)	119	DLS	Neutral	1	No		PLC enzyme	4000	60				None			-2.2	ELS				8.1	37
3	Chibowski et al.., 2016, Adsorption	DOPC	TLE, extrusion			Large unilamellar vehicles (LUVs, > 100 nm)	175	DLS	Neutral	1	No								None			3.1	ELS				8.1	20
3	Chibowski et al.., 2016, Adsorption	DOPC	TLE, extrusion			Large unilamellar vehicles (LUVs, > 100 nm)	172	DLS	Neutral	1	No		PLC enzyme	4000	1				None			2.7	ELS				8.1	20
3	Chibowski et al.., 2016, Adsorption	DOPC	TLE, extrusion			Large unilamellar vehicles (LUVs, > 100 nm)	168	DLS	Neutral	1	No		PLC enzyme	4000	60				None			6.3	ELS				8.1	20
3	Chibowski et al.., 2016, Adsorption	DOPC	TLE, extrusion			Large unilamellar vehicles (LUVs, > 100 nm)	185	DLS	Neutral	1	No								None			3.6	ELS				8.1	37
3	Chibowski et al.., 2016, Adsorption	DOPC	TLE, extrusion			Large unilamellar vehicles (LUVs, > 100 nm)	86	DLS	Neutral	1	No		PLC enzyme	4000	1				None			1.9	ELS				8.1	37
3	Chibowski et al.., 2016, Adsorption	DOPC	TLE, extrusion			Large unilamellar vehicles (LUVs, > 100 nm)	190	DLS	Neutral	1	No		PLC enzyme	4000	60				None			3.4	ELS				8.1	37
4	Taylor et al.., 2007, Food Biophysics	DSPC	TLE, thermal cycling, extrusion			Small unilamellar (SUV, 20-100 nm)			Neutral	1	No								None			-8.3	ELS				7.4	25
4	Taylor et al.., 2007, Food Biophysics	DSPC	TLE, thermal cycling, extrusion			Small unilamellar (SUV, 20-100 nm)			Neutral	1	No								Nisin		5	-7.6	ELS				7.4	25
4	Taylor et al.., 2007, Food Biophysics	DSPC	TLE, thermal cycling, extrusion			Small unilamellar (SUV, 20-100 nm)			Neutral	1	No								Nisin		10	-6.89	ELS				7.4	25
4	Taylor et al.., 2007, Food Biophysics	DSPC	TLE, thermal cycling, extrusion			Small unilamellar (SUV, 20-100 nm)			Neutral	1	No								None			-9.74	ELS				7.4	75
4	Taylor et al.., 2007, Food Biophysics	DSPC	TLE, thermal cycling, extrusion			Small unilamellar (SUV, 20-100 nm)			Neutral	1	No								Nisin		5	-6.59	ELS				7.4	75
4	Taylor et al.., 2007, Food Biophysics	DSPC	TLE, thermal cycling, extrusion			Small unilamellar (SUV, 20-100 nm)			Neutral	1	No								Nisin		10	-8.55	ELS				7.4	75
4	Taylor et al.., 2007, Food Biophysics	DSPC/DSPG	TLE, thermal cycling, extrusion			Small unilamellar (SUV, 20-100 nm)			Neutral	8.0 / 2.0	No								None			-52.28	ELS				7.4	25
4	Taylor et al.., 2007, Food Biophysics	DSPC/PG	TLE, thermal cycling, extrusion			Small unilamellar (SUV, 20-100 nm)			Neutral	8.0 / 2.0	No								Nisin		5	-54.93	ELS				7.4	25
4	Taylor et al.., 2007, Food Biophysics	DSPC/PG	TLE, thermal cycling, extrusion			Small unilamellar (SUV, 20-100 nm)			Neutral	8.0 / 2.0	No								Nisin		10	-52.64	ELS				7.4	25
4	Taylor et al.., 2007, Food Biophysics	DSPC/PG	TLE, thermal cycling, extrusion			Small unilamellar (SUV, 20-100 nm)			Neutral	8.0 / 2.0	No								None			-54.72	ELS				7.4	75
4	Taylor et al.., 2007, Food Biophysics	DSPC/PG	TLE, thermal cycling, extrusion			Small unilamellar (SUV, 20-100 nm)			Neutral	8.0 / 2.0	No								Nisin		5	-57.93	ELS				7.4	75
4	Taylor et al.., 2007, Food Biophysics	DSPC/PG	TLE, thermal cycling, extrusion			Small unilamellar (SUV, 20-100 nm)			Neutral	8.0 / 2.0	No								Nisin		10	-57.82	ELS				7.4	75
4	Taylor et al.., 2007, Food Biophysics	DSPC/DSPG	TLE, thermal cycling, extrusion			Small unilamellar (SUV, 20-100 nm)			Neutral	6.0 / 4.0	No								None			-72.6	ELS				7.4	25
4	Taylor et al.., 2007, Food Biophysics	DSPC/PG	TLE, thermal cycling, extrusion			Small unilamellar (SUV, 20-100 nm)			Neutral	6.0 / 4.0	No								Nisin		5	-60.44	ELS				7.4	25
4	Taylor et al.., 2007, Food Biophysics	DSPC/PG	TLE, thermal cycling, extrusion			Small unilamellar (SUV, 20-100 nm)			Neutral	6.0 / 4.0	No								Nisin		10	-58.81	ELS				7.4	25
4	Taylor et al.., 2007, Food Biophysics	DSPC/PG	TLE, thermal cycling, extrusion			Small unilamellar (SUV, 20-100 nm)			Neutral	6.0 / 4.0	No								None			-72.51	ELS				7.4	75
4	Taylor et al.., 2007, Food Biophysics	DSPC/PG	TLE, thermal cycling, extrusion			Small unilamellar (SUV, 20-100 nm)			Neutral	6.0 / 4.0	No								Nisin		5	-70.18	ELS				7.4	75
4	Taylor et al.., 2007, Food Biophysics	DSPC/PG	TLE, thermal cycling, extrusion			Small unilamellar (SUV, 20-100 nm)			Neutral	6.0 / 4.0	No								Nisin		10	-70.11	ELS				7.4	75
5	Takeuchi et al., 1996, FEBS Letters	DOPE/Chol I	TLE			Small unilamellar (SUV, 20-100 nm)			Cationic	6.0 / 4.0	Yes								None			12.6	ELS					25
5	Takeuchi et al., 1996, FEBS Letters	DOPE/Chol II	TLE			Small unilamellar (SUV, 20-100 nm)			Cationic	6.0 / 4.0	Yes								None			26.5	ELS					25
5	Takeuchi et al., 1996, FEBS Letters	DOPE/Chol II (ethyl)	TLE			Small unilamellar (SUV, 20-100 nm)			Cationic	6.0 / 4.0	Yes								None			9	ELS					25
5	Takeuchi et al., 1996, FEBS Letters	DOPE/Chol II (isopropyl)	TLE			Small unilamellar (SUV, 20-100 nm)			Cationic	6.0 / 4.0	Yes								None			11.1	ELS					25
5	Takeuchi et al., 1996, FEBS Letters	DOPE/Chol III	TLE			Small unilamellar (SUV, 20-100 nm)			Cationic	6.0 / 4.0	Yes								None			27.5	ELS					25
5	Takeuchi et al., 1996, FEBS Letters	DOPE/Chol IV	TLE			Small unilamellar (SUV, 20-100 nm)			Cationic	6.0 / 4.0	Yes								None			33.6	ELS					25
5	Takeuchi et al., 1996, FEBS Letters	DOPE/Chol IV (ethyl)	TLE			Small unilamellar (SUV, 20-100 nm)			Cationic	6.0 / 4.0	Yes								None			22.2	ELS					25
5	Takeuchi et al., 1996, FEBS Letters	DOPE/Chol V	TLE			small unilamellar (SUV, 20-100 nm)			Cationic	6.0 / 4.0	Yes								None			27.5	ELS					25
6	Zouliati et al., 2022, Colloids and Surfaces A: Physicochemical and Engineering Aspects	HPC	TLE			Small unilamellar (SUV, 20-100 nm)	98	DLS	Neutral	1	No								None			3	ELS		0.301	DLS	5-7 (HPLC-grade water)	25
6	Zouliati et al., 2022, Colloids and Surfaces A: Physicochemical and Engineering Aspects	EPC	TLE			Small unilamellar (SUV, 20-100 nm)	108.6	DLS	Neutral	1	No								None			-0.8	ELS		0.396	DLS	5-7 (HPLC-grade water)	25
6	Zouliati et al., 2022, Colloids and Surfaces A: Physicochemical and Engineering Aspects	HPC/EPC	TLE			Small unilamellar (SUV, 20-100 nm)	117.5	DLS	Neutral	8.5 / 1.5	No								None			1.9	ELS		0.501	DLS	5-7 (HPLC-grade water)	25
6	Zouliati et al., 2022, Colloids and Surfaces A: Physicochemical and Engineering Aspects	HPC/EPC/Chol	TLE			Small unilamellar (SUV, 20-100 nm)	179.1	DLS	Neutral	6.7 / 2.3 / 2	Yes								None			0.7	ELS		0.609	DLS	5-7 (HPLC-grade water)	25
6	Zouliati et al., 2022, Colloids and Surfaces A: Physicochemical and Engineering Aspects	HPC/EPC/DPPG	TLE			Small unilamellar (SUV, 20-100 nm)	81	DLS	Anionic	8 / 1.5 / 0.5	No								None			-20.7	ELS		0.364	DLS	5-7 (HPLC-grade water)	25
6	Zouliati et al., 2022, Colloids and Surfaces A: Physicochemical and Engineering Aspects	HPC/EPC/DOTAP	TLE			Small unilamellar (SUV, 20-100 nm)	92.3	DLS	Cationic	8 / 1.5 / 0.5	No								None			43.1	ELS		0.339	DLS	5-7 (HPLC-grade water)	25
6	Zouliati et al., 2022, Colloids and Surfaces A: Physicochemical and Engineering Aspects	HPC/EPC/DMC	TLE			Small unilamellar (SUV, 20-100 nm)	193	DLS	Neutral	8 / 1.5 / 0.06	No								DMC	10:0.06	34	0.1	ELS		0.815	DLS	5-7 (HPLC-grade water)	25
6	Zouliati et al., 2022, Colloids and Surfaces A: Physicochemical and Engineering Aspects	HPC/EPC/DPPG/DMC	TLE			Small unilamellar (SUV, 20-100 nm)	129.7	DLS	Anionic	8 / 1.5 / 0.5 / 0.06	No								DMC	10:0.06	34	-32.8	ELS		0.466	DLS	5-7 (HPLC-grade water)	25
6	Zouliati et al., 2022, Colloids and Surfaces A: Physicochemical and Engineering Aspects	HPC/EPC/DOTAP/DMC	TLE			Small unilamellar (SUV, 20-100 nm)	107.2	DLS	Cationic	8 / 1.5 / 0.5 / 0.06	No								DMC	10:0.06	34	14.7	ELS		0.4	DLS	5-7 (HPLC-grade water)	25
7	Li et al., 2022, International Journal of Nanomedicine	Chol/SPC	TLE			Large unilamellar vehicles (LUVs, > 100 nm)	181.77	DLS	Neutral	2.0 / 8.0	Yes	Soybean lectihin							HAS	20:1	0.263381	-53.8	ELS		0.207	DLS	5-7 (purified water)	25	73.19	4.07
8	Baranauskaite et al., 2018, BioMed Research International	P 90H	TLE			No information	1176	DLS	Neutral	1	No								None			1.53	ELS		0.23	DLS	5-7 (purified water)	25
8	Baranauskaite et al., 2018, BioMed Research International	P 90H/DMPG	TLE			No information	107	DLS	Anionic	50 / 50	No								None			-35.7	ELS		0.25	DLS	5-7 (purified water)	25
8	Baranauskaite et al., 2018, BioMed Research International	P 90H/DMPG	TLE			No information	97.48	DLS	Anionic	33.3 / 66.7	No								None			-40.5	ELS		0.34	DLS	5-7 (purified water)	25
8	Baranauskaite et al., 2018, BioMed Research International	P 90H/DMPG	TLE			No information	43.9	DLS	Anionic	25 / 75	No								None			-49.5	ELS		0.54	DLS	5-7 (purified water)	25
8	Baranauskaite et al., 2018, BioMed Research International	P 90H/oregano extract	TLE			No information	2660	DLS	Anionic	50 / 50	No								Oregano extract	1:1		12.45	ELS		0.33	DLS	5-7 (purified water)	25
8	Baranauskaite et al., 2018, BioMed Research International	P 90H/DMPG/oregano extract	TLE			No information	234.3	DLS	Anionic	25 / 25 / 50	No								Oregano extract	1:1		-30.9	ELS		0.35	DLS	5-7 (purified water)	25
8	Baranauskaite et al., 2018, BioMed Research International	P 90H/DMPG/oregano extract	TLE			No information	266.1	DLS	Anionic	11.1 / 22.2 / 66.7	No								Oregano extract	1:2		-28.5	ELS		0.47	DLS	5-7 (purified water)	25
8	Baranauskaite et al., 2018, BioMed Research International	P 90H/DMPG/oregano extract	TLE			No information	634.3	DLS	Anionic	8.3 / 25 / 66.7	No								Oregano extract	1:3		-25.9	ELS		0.57	DLS	5-7 (purified water)	25
9	Hohokabe et al., 2023, Colloids and Surfaces A: Physicochemical and Engineering Aspects 661	DSPG	TLE, extrusion			Multilamellar vehicles (MLVs, > 500 nm)	102.9	DLS	Anionic	1	No								None			-49.8	ELS				7.4	25
9	Hohokabe et al., 2023, Colloids and Surfaces A: Physicochemical and Engineering Aspects 662	TMAG/DSPG	TLE, extrusion			Multilamellar vehicles (MLVs, > 500 nm)	104.2	DLS	Anionic	1.0 / 9.0	No								None			-50.4	ELS				7.4	25
9	Hohokabe et al., 2023, Colloids and Surfaces A: Physicochemical and Engineering Aspects 663	TMAG/DSPG	TLE, extrusion			Multilamellar vehicles (MLVs, > 500 nm)	99.4	DLS	Anionic	2.0 / 8.0	No								None			-47.9	ELS				7.4	25
9	Hohokabe et al., 2023, Colloids and Surfaces A: Physicochemical and Engineering Aspects 664	TMAG/DSPG	TLE, extrusion			Multilamellar vehicles (MLVs, > 500 nm)	103	DLS	Anionic	3.0 / 7.0	No								None			-41	ELS				7.4	25
9	Hohokabe et al., 2023, Colloids and Surfaces A: Physicochemical and Engineering Aspects 665	TMAG/DSPG	TLE, extrusion			Multilamellar vehicles (MLVs, > 500 nm)	104	DLS	Anionic	4.0 / 6.0	No								None			-37.3	ELS				7.4	25
9	Hohokabe et al., 2023, Colloids and Surfaces A: Physicochemical and Engineering Aspects 666	TMAG/DSPG	TLE, extrusion			Multilamellar vehicles (MLVs, > 500 nm)	106.6	DLS	Cationic	7.0 / 3.0	No								None			38.3	ELS				7.4	25
9	Hohokabe et al., 2023, Colloids and Surfaces A: Physicochemical and Engineering Aspects 667	TMAG/DSPG	TLE, extrusion			Multilamellar vehicles (MLVs, > 500 nm)	106.1	DLS	Cationic	8.0 / 2.0	No								None			35.4	ELS				7.4	25
9	Hohokabe et al., 2023, Colloids and Surfaces A: Physicochemical and Engineering Aspects 668	TMAG/DSPG	TLE, extrusion			Multilamellar vehicles (MLVs, > 500 nm)	111.6	DLS	Cationic	9.0 / 1.0	No								None			41.4	ELS				7.4	25
9	Hohokabe et al., 2023, Colloids and Surfaces A: Physicochemical and Engineering Aspects 669	TMAG	TLE, extrusion			Multilamellar vehicles (MLVs, > 500 nm)	109.5	DLS	Cationic	1	No								None			38.4	ELS				7.4	25
10	Elsana et al., 2019. Scientific Reports	DOPE/DOTAP/Chol	Microfluidic method (NanoAssembl)			Combination of uni and multilamellar vesicles	79.51	DLS	Cationic	40 / 20 / 20	Yes								None			44.1	ELS		0.108	DLS
10	Elsana et al., 2019. Scientific Reports	DOPE/DOTAP/Chol	Microfluidic method (NanoAssembl)			Combination of uni and multilamellar vesicles	152	DLS	Cationic	40 / 20 / 20	Yes								DNA	5:1	2.376	42.1	ELS		0.126	DLS			74.1
10	Elsana et al., 2019. Scientific Reports	DOPE/DOTAP/Chol/CD	Microfluidic method (NanoAssembl)			Combination of uni and multilamellar vesicles	95.71	DLS	Cationic	40 / 20 / 20	Yes					carboxymethyl-β-cyclodextrin		21:3	None			27.6	ELS		0.324	DLS
10	Elsana et al., 2019. Scientific Reports	DOPE/DOTAP/Chol/CD	Microfluidic method (NanoAssembl)			Combination of uni and multilamellar vesicles	161	DLS	Cationic	40 / 20 / 20	Yes					carboxymethyl-β-cyclodextrin		21:3	DNA	5:1	2.772	24.5	ELS		0.194	DLS			89.62
10	Elsana et al., 2019. Scientific Reports	DOPE/DOTAP/Chol/CD/PL	Microfluidic method (NanoAssembl)			Combination of uni and multilamellar vesicles	105	DLS	Cationic	40 / 20 / 20	Yes					carboxymethyl-β-cyclodextrin, Pluronic-F127		21:3:0,3	None			35.8	ELS		0.249	DLS
10	Elsana et al., 2019. Scientific Reports	DOPE/DOTAP/Chol/CD/PL	Microfluidic method (NanoAssembl)			Combination of uni and multilamellar vesicles	149	DLS	Cationic	40 / 20 / 20	Yes					carboxymethyl-β-cyclodextrin, Pluronic-F127		21:3:0,3	DNA	5:1	2.838	34.1	ELS		0.455	DLS			76.5
10	Elsana et al., 2019. Scientific Reports	DOPE/DOTAP/Chol/PL	Microfluidic method (NanoAssembl)			Combination of uni and multilamellar vesicles	86.66	DLS	Cationic	40 / 20 / 20	Yes					Pluronic-F127		21:0,3	None			31.6	ELS		0.127	DLS
10	Elsana et al., 2019. Scientific Reports	DOPE/DOTAP/Chol/PL	Microfluidic method (NanoAssembl)			Combination of uni and multilamellar vesicles	98.27	DLS	Cationic	40 / 20 / 20	Yes					Pluronic-F127		21:0,3	DNA	5:1	2.442	29.4	ELS		0.136	DLS			78.3
10	Elsana et al., 2019. Scientific Reports	DOPE/DOTAP/Chol	TLE			Combination of uni and multilamellar vesicles	247	DLS	Cationic	40 / 20 / 20	Yes								None			56	ELS		0.324	DLS
10	Elsana et al., 2019. Scientific Reports	DOPE/DOTAP/Chol	TLE			Combination of uni and multilamellar vesicles	109	DLS	Cationic	40 / 20 / 20	Yes								DNA	5:1	2.376	48	ELS		0.339	DLS			66.95
10	Elsana et al., 2019. Scientific Reports	DOPE/DOTAP/Chol/CD	TLE			Combination of uni and multilamellar vesicles	287	DLS	Cationic	40 / 20 / 20	Yes					carboxymethyl-β-cyclodextrin		21:3	None			52	ELS		0.336	DLS
10	Elsana et al., 2019. Scientific Reports	DOPE/DOTAP/Chol/CD	TLE			Combination of uni and multilamellar vesicles	186	DLS	Cationic	40 / 20 / 20	Yes					carboxymethyl-β-cyclodextrin		21:3	DNA	5:1	2.772	45	ELS		0.235	DLS			75.93
10	Elsana et al., 2019. Scientific Reports	DOPE/DOTAP/Chol/CD/PL	TLE			Combination of uni and multilamellar vesicles	294	DLS	Cationic	40 / 20 / 20	Yes					carboxymethyl-β-cyclodextrin, Pluronic-F127		21:3:0,3	None			55	ELS		0.202	DLS
10	Elsana et al., 2019. Scientific Reports	DOPE/DOTAP/Chol/CD/PL	TLE			Combination of uni and multilamellar vesicles	204	DLS	Cationic	40 / 20 / 20	Yes					carboxymethyl-β-cyclodextrin, Pluronic-F127		21:3:0,3	DNA	5:1	2.838	50.6	ELS		0.341	DLS			57.43
10	Elsana et al., 2019. Scientific Reports	DOPE/DOTAP/Chol/PL	TLE			Combination of uni and multilamellar vesicles	217	DLS	Cationic	40 / 20 / 20	Yes					Pluronic-F127		21:0,3	None			53.5	ELS		0.436	DLS
10	Elsana et al., 2019. Scientific Reports	DOPE/DOTAP/Chol/PL	TLE			Combination of uni and multilamellar vesicles	119	DLS	Cationic	40 / 20 / 20	Yes					Pluronic-F127		21:0,3	DNA	5:1	2.442	50.2	ELS		0.239	DLS			54.4
11	Yu et al., 2022. Brazilian Journal of Pharmaceutical Sciences	DOTAP/DOPE/DCChol	Ethanol dilution method			No information	150	DLS	Cationic	70 / 15 / 15	No								DNA	10:1	57.234	-2.53	ELS				7.4	25
11	Yu et al., 2022. Brazilian Journal of Pharmaceutical Sciences	DOTAP/DOPE/DCChol	Ethanol dilution method			No information	150	DLS	Cationic	50 / 25 / 25	No								DNA	10:1	57.234	30	ELS				7.4	25
11	Yu et al., 2022. Brazilian Journal of Pharmaceutical Sciences	DOTAP/DOPE/DCChol	Ethanol dilution method			No information	150	DLS	Cationic	40 / 30 / 30	No								DNA	10:1	57.234	30	ELS				7.4	25
11	Yu et al., 2022. Brazilian Journal of Pharmaceutical Sciences	DOTAP/DOPE/DCChol	Ethanol dilution method			No information	150	DLS	Cationic	40 / 10 / 50	No								DNA	10:1	57.234	30	ELS				7.4	25
12	Soema et al., 2015. European Journal of Pharmaceutics and Biopharmaceutics	DCChol	TLE, extrusion			No information	136	DLS	Cationic	1	No		HLA-A2.1-restricted influenza peptide GILGFVFTL (M158-66)	10					None			64	ELS		0.13	DLS	7.4
12	Soema et al., 2015. European Journal of Pharmaceutics and Biopharmaceutics	DOTAP	TLE, extrusion			No information	154	DLS	Cationic	1	No		HLA-A2.1-restricted influenza peptide GILGFVFTL (M158-66)	10					None			72	ELS		0.14	DLS	7.4
12	Soema et al., 2015. European Journal of Pharmaceutics and Biopharmaceutics	EPC	TLE, extrusion			No information	182	DLS	Neutral	1	No		HLA-A2.1-restricted influenza peptide GILGFVFTL (M158-66)	10					None			7	ELS		0.14	DLS	7.4
12	Soema et al., 2015. European Journal of Pharmaceutics and Biopharmaceutics	DCChol/DOTAP/EPC	TLE, extrusion			No information	147	DLS	Cationic	33.3 / 33.3 / 33.3	No		HLA-A2.1-restricted influenza peptide GILGFVFTL (M158-66)	10					None			64	ELS		0.09	DLS	7.4
12	Soema et al., 2015. European Journal of Pharmaceutics and Biopharmaceutics	DCChol	TLE, extrusion			No information	156	DLS	Cationic	1	No		HLA-A2.1-restricted influenza peptide GILGFVFTL (M158-66)	100					None			70	ELS		0.15	DLS	7.4
12	Soema et al., 2015. European Journal of Pharmaceutics and Biopharmaceutics	DOTAP	TLE, extrusion			No information	147	DLS	Cationic	1	No		HLA-A2.1-restricted influenza peptide GILGFVFTL (M158-66)	100					None			69	ELS		0.15	DLS	7.4
12	Soema et al., 2015. European Journal of Pharmaceutics and Biopharmaceutics	EPC	TLE, extrusion			No information	176	DLS	Neutral	1	No		HLA-A2.1-restricted influenza peptide GILGFVFTL (M158-66)	100					None			1	ELS		0.15	DLS	7.4
12	Soema et al., 2015. European Journal of Pharmaceutics and Biopharmaceutics	DOPE/DOTAP/EPC	TLE, extrusion			No information	146	DLS	Cationic	33.3 / 33.3 / 33.3	No		HLA-A2.1-restricted influenza peptide GILGFVFTL (M158-66)	100					None			57	ELS		0.13	DLS	7.4
12	Soema et al., 2015. European Journal of Pharmaceutics and Biopharmaceutics	DOPE/DCChol/EPC	TLE, extrusion			No information	151	DLS	Cationic	33.3 / 33.3 / 33.3	No		HLA-A2.1-restricted influenza peptide GILGFVFTL (M158-66)	100					None			41	ELS		0.1	DLS	7.4
12	Soema et al., 2015. European Journal of Pharmaceutics and Biopharmaceutics	DOPE/DCChol/DOTAP	TLE, extrusion			No information	151	DLS	Cationic	33.3 / 33.3 / 33.3	No		HLA-A2.1-restricted influenza peptide GILGFVFTL (M158-66)	100					None			66	ELS		0.11	DLS	7.4
12	Soema et al., 2015. European Journal of Pharmaceutics and Biopharmaceutics	DOPE/DCChol/DOTAP/EPC	TLE, extrusion			No information	144	DLS	Cationic	25 / 25 / 25 / 25	No		HLA-A2.1-restricted influenza peptide GILGFVFTL (M158-66)	55					None			61	ELS		0.11	DLS	7.4
12	Soema et al., 2015. European Journal of Pharmaceutics and Biopharmaceutics	DOPE/DCChol/DOTAP/EPC	TLE, extrusion			No information	181.1	DLS	Cationic	3 / 7 / 13 / 77	No		HLA-A2.1-restricted influenza peptide GILGFVFTL (M158-66)	13.4					None			30.3	ELS		0.12	DLS	7.4
13	Ternullo et al., 2020. Pharmaceutics	SPC/Polysorbate20	TLE			No information	288.73	DLS	Neutral	85 / 15	No	Polysorbate20							Curcumin	10:1	2000	-3.03	ELS		0.17	DLS	5-7 (purified water)	25	43.97
13	Ternullo et al., 2020. Pharmaceutics	SPC/SA/Polysorbate20	TLE			No information	252.24	DLS	Cationic	76.5 / 8.5 / 15	No	SA, Polysorbate20							Curcumin	10:1	2000	34.01	ELS		0.17	DLS	5-7 (purified water)	25	55.04
13	Ternullo et al., 2020. Pharmaceutics	SPC/SDCh	TLE			No information	291.54	DLS	Anionic	85 / 15	No	SDCh							Curcumin	10:1	2000	-34.83	ELS		0.17	DLS	5-7 (purified water)	25	76.4
14	Ternullo et al., 2019. Pharmaceutics	SPC/Polysorbate20	TLE			No information	286.1	DLS	Neutral	85 / 15	No	Polysorbate20							Curcumin	10:1	2000	-2.3	ELS		0.17	DLS	5-7 (purified water)	25	80.2
14	Ternullo et al., 2019. Pharmaceutics	SPC/SA/Polysorbate20	TLE			No information	231.5	DLS	Cationic	76.5 / 8.5 / 15	No	SA, Polysorbate20							Curcumin	10:1	2000	33.7	ELS		0.22	DLS	5-7 (purified water)	25	97.1
14	Ternullo et al., 2019. Pharmaceutics	SPC/SDCh	TLE			No information	299.3	DLS	Anionic	85 / 15	No	SDCh							Curcumin	10:1	2000	-34.9	ELS		0.2	DLS	5-7 (purified water)	25	89.1
15	Mura et al., 2021. Pharmaceutics	EPC/Chol/SA	TLE			Multilamellar vehicles (MLVs, > 500 nm)	240	DLS	Cationic	69 / 12 / 19	Yes	SA							Butamben		10000	30.2	ELS		0.22	DLS	5-7 (purified water)	25	92.2
15	Mura et al., 2021. Pharmaceutics	EPC/Chol/SA	TLE			Multilamellar vehicles (MLVs, > 500 nm)	280	DLS	Cationic	69 / 12 / 19	Yes	SA							Butamben		10000	39.8	ELS		0.24	DLS	5-7 (purified water)	25	93.8
15	Mura et al., 2021. Pharmaceutics	EPC/Chol/SA/SDCh	TLE			Multilamellar vehicles (MLVs, > 500 nm)	260	DLS	Cationic	61 / 11 / 17 / 11	Yes	SA, SDCh							Butamben; its complex with RAMEB		5000; 5000	5.1	ELS		0.23	DLS	5-7 (purified water)	25	94.6
15	Mura et al., 2021. Pharmaceutics	EPC/Chol/SA/SDCh	TLE			Multilamellar vehicles (MLVs, > 500 nm)	290	DLS	Cationic	61 / 11 / 17 / 11	Yes	SA, SDCh							Butamben; its complex with RAMEB		5000; 5000	12.1	ELS		0.25	DLS	5-7 (purified water)	25	99.8
16	Salem et al., 2016. Drug Design, Development and Therapy	SPC/Chol/Span60	TLE			No information	88.1	DLS	Neutral	73 / 24 / 2	Yes	Span60							Flucytosine		15000	-46.4	ELS		0.239	DLS	7.4		70.52
16	Salem et al., 2016. Drug Design, Development and Therapy	SPC/Chol/Span61	TLE			No information	107.5	DLS	Neutral	65 / 32 / 3	Yes	Span60							Flucytosine		15000	-52.8	ELS		0.29	DLS	7.4		73.84
16	Salem et al., 2016. Drug Design, Development and Therapy	SPC/Chol/Span62	TLE			No information	120.1	DLS	Neutral	48 / 48 / 4	Yes	Span60							Flucytosine		15000	-55.4	ELS		0.204	DLS	7.4		80.85
16	Salem et al., 2016. Drug Design, Development and Therapy	SPC/Chol/Span60/SA	TLE			No information	122.9	DLS	Cationic	46.5 / 46.5 / 5 / 2	Yes	Span60, SA							Flucytosine		15000	23.1	ELS		0.309	DLS	7.4		79.01
16	Salem et al., 2016. Drug Design, Development and Therapy	SPC/Chol/Span60/SA	TLE			No information	129	DLS	Cationic	45 / 45 / 5 / 5	Yes	Span60, SA							Flucytosine		15000	28.4	ELS		0.24	DLS	7.4		75.72
16	Salem et al., 2016. Drug Design, Development and Therapy	SPC/Chol/Span60/SA	TLE			No information	135.1	DLS	Cationic	44.5 / 44.5 / 4 / 7	Yes	Span60, SA							Flucytosine		15000	42.5	ELS		0.27	DLS	7.4		74.22
16	Salem et al., 2016. Drug Design, Development and Therapy	SPC/Chol/Span60/DCP	TLE			No information	150.5	DLS	Anionic	46.5 / 46.5 / 5 / 2	Yes	Span60, DCP							Flucytosine		15000	-56.9	ELS		0.445	DLS	7.4		81.41
16	Salem et al., 2016. Drug Design, Development and Therapy	SPC/Chol/Span60/DCP	TLE			No information	158.9	DLS	Anionic	45 / 45 / 5 / 5	Yes	Span60, DCP							Flucytosine		15000	-59.1	ELS		0.258	DLS	7.4		84.37
16	Salem et al., 2016. Drug Design, Development and Therapy	SPC/Chol/Span60/DCP	TLE			No information	174.1	DLS	Anionic	44.5 / 44.5 / 4 / 7	Yes	Span60, DCP							Flucytosine		15000	-63	ELS		0.413	DLS	7.4		85.52
17	Villasamil-Sanchez et al., 2010. Drug Development and Industrial Pharmacy	EPC/Chol/SA	TLE			Multilamellar vehicles (MLVs, > 500 nm)	408.6	DLS	Cationic	50 / 40 / 10	Yes	SA							Sumatriptan		66670	35.4	ELS		0.56	DLS	5-7 (purified water)	25	53.68
17	Villasamil-Sanchez et al., 2010. Drug Development and Industrial Pharmacy	EPC/Chol/SA	TLE			Multilamellar vehicles (MLVs, > 500 nm)	311.4	DLS	Cationic	45.5 / 36.5 / 18	Yes	SA							Sumatriptan		66670	26.26	ELS		0.25	DLS	5-7 (purified water)	25	43.05
17	Villasamil-Sanchez et al., 2010. Drug Development and Industrial Pharmacy	EPC/Chol/SA	TLE			Multilamellar vehicles (MLVs, > 500 nm)	348.7	DLS	Cationic	42 / 33 / 25	Yes	SA							Sumatriptan		66670	37.9	ELS		0.28	DLS	5-7 (purified water)	25	39.16
17	Villasamil-Sanchez et al., 2010. Drug Development and Industrial Pharmacy	EPC/Chol/SA	TLE			Multilamellar vehicles (MLVs, > 500 nm)	812.4	DLS	Anionic	50 / 40 / 10	Yes	DCP							Sumatriptan		66670	-72	ELS		1	DLS	5-7 (purified water)	25	12.83
17	Villasamil-Sanchez et al., 2010. Drug Development and Industrial Pharmacy	EPC/Chol/DCP	TLE			Multilamellar vehicles (MLVs, > 500 nm)	731.9	DLS	Anionic	49 / 39 / 12	Yes	DCP							Sumatriptan		66670	-61.3	ELS		1	DLS	5-7 (purified water)	25	29.79
17	Villasamil-Sanchez et al., 2010. Drug Development and Industrial Pharmacy	EPC/Chol/DCP	TLE			Multilamellar vehicles (MLVs, > 500 nm)	635.9	DLS	Anionic	48 / 38 / 14	Yes	DCP							Sumatriptan		66670	-59.8	ELS		0.817	DLS	5-7 (purified water)	25	41.87
17	Villasamil-Sanchez et al., 2010. Drug Development and Industrial Pharmacy	EPC/Chol/DCP	TLE			Multilamellar vehicles (MLVs, > 500 nm)	617.8	DLS	Anionic	45.5 / 36.5 / 18	Yes	DCP							Sumatriptan		66670	-68.4	ELS		0.634	DLS	5-7 (purified water)	25	27.9
17	Villasamil-Sanchez et al., 2010. Drug Development and Industrial Pharmacy	EPC/Chol/DCP	TLE			Multilamellar vehicles (MLVs, > 500 nm)	549.2	DLS	Anionic	42 / 33 / 25	Yes	DCP							Sumatriptan		66670	-68.1	ELS		0.37	DLS	5-7 (purified water)	25	32.54
17	Villasamil-Sanchez et al., 2010. Drug Development and Industrial Pharmacy	EPC/Chol/SA	REV			Large unilamellar vehicles (LUVs, > 100 nm) and oligolamellar (OLVs, 100-1000 nm)	313.5	DLS	Cationic	50 / 40 / 10	Yes	SA							Sumatriptan		66670	24.42	ELS		0.3	DLS	5-7 (purified water)	25	60.1
17	Villasamil-Sanchez et al., 2010. Drug Development and Industrial Pharmacy	EPC/Chol/SA	REV			Large unilamellar vehicles (LUVs, > 100 nm) and oligolamellar (OLVs, 100-1000 nm)	376.5	DLS	Cationic	45.5 / 36.5 / 18	Yes	SA							Sumatriptan		66670	31.27	ELS		0.18	DLS	5-7 (purified water)	25	56.67
17	Villasamil-Sanchez et al., 2010. Drug Development and Industrial Pharmacy	EPC/Chol/SA	REV			Large unilamellar vehicles (LUVs, > 100 nm) and oligolamellar (OLVs, 100-1000 nm)	603.7	DLS	Cationic	42 / 33 / 25	Yes	SA							Sumatriptan		66670	33.24	ELS		0.34	DLS	5-7 (purified water)	25	54.27
17	Villasamil-Sanchez et al., 2010. Drug Development and Industrial Pharmacy	EPC/Chol/SA	REV			Large unilamellar vehicles (LUVs, > 100 nm) and oligolamellar (OLVs, 100-1000 nm)	671.5	DLS	Anionic	50 / 40 / 10	Yes	DCP							Sumatriptan		66670	-70.1	ELS		0.802	DLS	5-7 (purified water)	25	29.11
17	Villasamil-Sanchez et al., 2010. Drug Development and Industrial Pharmacy	EPC/Chol/DCP	REV			Large unilamellar vehicles (LUVs, > 100 nm) and oligolamellar (OLVs, 100-1000 nm)	613.9	DLS	Anionic	49 / 39 / 12	Yes	DCP							Sumatriptan		66670	-67.3	ELS		0.701	DLS	5-7 (purified water)	25	35.25
17	Villasamil-Sanchez et al., 2010. Drug Development and Industrial Pharmacy	EPC/Chol/DCP	REV			Large unilamellar vehicles (LUVs, > 100 nm) and oligolamellar (OLVs, 100-1000 nm)	649.8	DLS	Anionic	48 / 38 / 14	Yes	DCP							Sumatriptan		66670	-73	ELS		0.95	DLS	5-7 (purified water)	25	34.52
17	Villasamil-Sanchez et al., 2010. Drug Development and Industrial Pharmacy	EPC/Chol/DCP	REV			Large unilamellar vehicles (LUVs, > 100 nm) and oligolamellar (OLVs, 100-1000 nm)	672.5	DLS	Anionic	45.5 / 36.5 / 18	Yes	DCP							Sumatriptan		66670	-77.6	ELS		1	DLS	5-7 (purified water)	25	49.81
17	Villasamil-Sanchez et al., 2010. Drug Development and Industrial Pharmacy	EPC/Chol/DCP	REV			Large unilamellar vehicles (LUVs, > 100 nm) and oligolamellar (OLVs, 100-1000 nm)	860.6	DLS	Anionic	42 / 33 / 25	Yes	DCP							Sumatriptan		66670	-78.5	ELS		1	DLS	5-7 (purified water)	25	54.56
17	Villasamil-Sanchez et al., 2010. Drug Development and Industrial Pharmacy	EPC/Chol/SA	FAT			Not completed formation process	360	DLS	Cationic	50 / 40 / 10	Yes	SA							Sumatriptan		66670	46.3	ELS		0.48	DLS	5-7 (purified water)	25	19.37
17	Villasamil-Sanchez et al., 2010. Drug Development and Industrial Pharmacy	EPC/Chol/SA	FAT			Not completed formation process	351.1	DLS	Cationic	45.5 / 36.5 / 18	Yes	SA							Sumatriptan		66670	40.7	ELS		0.31	DLS	5-7 (purified water)	25	52.78
17	Villasamil-Sanchez et al., 2010. Drug Development and Industrial Pharmacy	EPC/Chol/SA	FAT			Not completed formation process	317.1	DLS	Cationic	42 / 33 / 25	Yes	SA							Sumatriptan		66670	56.7	ELS		0.26	DLS	5-7 (purified water)	25	50
17	Villasamil-Sanchez et al., 2010. Drug Development and Industrial Pharmacy	EPC/Chol/SA	FAT			Not completed formation process	531.8	DLS	Anionic	50 / 40 / 10	Yes	DCP							Sumatriptan		66670	-63.7	ELS		0.375	DLS	5-7 (purified water)	25	35.29
17	Villasamil-Sanchez et al., 2010. Drug Development and Industrial Pharmacy	EPC/Chol/DCP	FAT			Not completed formation process	521.5	DLS	Anionic	49 / 39 / 12	Yes	DCP							Sumatriptan		66670	-63	ELS		0.37	DLS	5-7 (purified water)	25	28.07
17	Villasamil-Sanchez et al., 2010. Drug Development and Industrial Pharmacy	EPC/Chol/DCP	FAT			Not completed formation process	599	DLS	Anionic	48 / 38 / 14	Yes	DCP							Sumatriptan		66670	-71.5	ELS		0.67	DLS	5-7 (purified water)	25	27.57
17	Villasamil-Sanchez et al., 2010. Drug Development and Industrial Pharmacy	EPC/Chol/DCP	FAT			Not completed formation process	445.1	DLS	Anionic	45.5 / 36.5 / 18	Yes	DCP							Sumatriptan		66670	-68.7	ELS		0.186	DLS	5-7 (purified water)	25	29.14
17	Villasamil-Sanchez et al., 2010. Drug Development and Industrial Pharmacy	EPC/Chol/DCP	FAT			Not completed formation process	505.1	DLS	Anionic	42 / 33 / 25	Yes	DCP							Sumatriptan		66670	-67.8	ELS		0.256	DLS	5-7 (purified water)	25	29.66
17	Villasamil-Sanchez et al., 2010. Drug Development and Industrial Pharmacy	EPC/Chol/SA	TLE			Multilamellar vehicles (MLVs, > 500 nm)			Cationic	50 / 40 / 10	Yes	SA							None			42	ELS				5-7 (purified water)	25
17	Villasamil-Sanchez et al., 2010. Drug Development and Industrial Pharmacy	EPC/Chol/SA	TLE			Multilamellar vehicles (MLVs, > 500 nm)			Cationic	45.5 / 36.5 / 18	Yes	SA							None			50	ELS				5-7 (purified water)	25
17	Villasamil-Sanchez et al., 2010. Drug Development and Industrial Pharmacy	EPC/Chol/SA	TLE			Multilamellar vehicles (MLVs, > 500 nm)			Cationic	42 / 33 / 25	Yes	SA							None			46	ELS				5-7 (purified water)	25
17	Villasamil-Sanchez et al., 2010. Drug Development and Industrial Pharmacy	EPC/Chol/SA	TLE			Multilamellar vehicles (MLVs, > 500 nm)			Anionic	50 / 40 / 10	Yes	DCP							None			54	ELS				5-7 (purified water)	25
17	Villasamil-Sanchez et al., 2010. Drug Development and Industrial Pharmacy	EPC/Chol/DCP	TLE			Multilamellar vehicles (MLVs, > 500 nm)			Anionic	49 / 39 / 12	Yes	DCP							None			49	ELS				5-7 (purified water)	25
17	Villasamil-Sanchez et al., 2010. Drug Development and Industrial Pharmacy	EPC/Chol/DCP	TLE			Multilamellar vehicles (MLVs, > 500 nm)			Anionic	48 / 38 / 14	Yes	DCP							None			48	ELS				5-7 (purified water)	25
17	Villasamil-Sanchez et al., 2010. Drug Development and Industrial Pharmacy	EPC/Chol/DCP	TLE			Multilamellar vehicles (MLVs, > 500 nm)			Anionic	45.5 / 36.5 / 18	Yes	DCP							None			45	ELS				5-7 (purified water)	25
17	Villasamil-Sanchez et al., 2010. Drug Development and Industrial Pharmacy	EPC/Chol/DCP	TLE			Multilamellar vehicles (MLVs, > 500 nm)			Anionic	42 / 33 / 25	Yes	DCP							None			50	ELS				5-7 (purified water)	25
17	Villasamil-Sanchez et al., 2010. Drug Development and Industrial Pharmacy	EPC/Chol/SA	REV			Large unilamellar vehicles (LUVs, > 100 nm) and oligolamellar (OLVs, 100-1000 nm)			Cationic	50 / 40 / 10	Yes	SA							None			49	ELS				5-7 (purified water)	25
17	Villasamil-Sanchez et al., 2010. Drug Development and Industrial Pharmacy	EPC/Chol/SA	REV			Large unilamellar vehicles (LUVs, > 100 nm) and oligolamellar (OLVs, 100-1000 nm)			Cationic	45.5 / 36.5 / 18	Yes	SA							None			-70	ELS				5-7 (purified water)	25
17	Villasamil-Sanchez et al., 2010. Drug Development and Industrial Pharmacy	EPC/Chol/SA	REV			Large unilamellar vehicles (LUVs, > 100 nm) and oligolamellar (OLVs, 100-1000 nm)			Cationic	42 / 33 / 25	Yes	SA							None			-69	ELS				5-7 (purified water)	25
17	Villasamil-Sanchez et al., 2010. Drug Development and Industrial Pharmacy	EPC/Chol/SA	REV			Large unilamellar vehicles (LUVs, > 100 nm) and oligolamellar (OLVs, 100-1000 nm)			Anionic	50 / 40 / 10	Yes	DCP							None			-60	ELS				5-7 (purified water)	25
17	Villasamil-Sanchez et al., 2010. Drug Development and Industrial Pharmacy	EPC/Chol/DCP	REV			Large unilamellar vehicles (LUVs, > 100 nm) and oligolamellar (OLVs, 100-1000 nm)			Anionic	49 / 39 / 12	Yes	DCP							None			68	ELS				5-7 (purified water)	25
17	Villasamil-Sanchez et al., 2010. Drug Development and Industrial Pharmacy	EPC/Chol/DCP	REV			Large unilamellar vehicles (LUVs, > 100 nm) and oligolamellar (OLVs, 100-1000 nm)			Anionic	48 / 38 / 14	Yes	DCP							None			-63	ELS				5-7 (purified water)	25
17	Villasamil-Sanchez et al., 2010. Drug Development and Industrial Pharmacy	EPC/Chol/DCP	REV			Large unilamellar vehicles (LUVs, > 100 nm) and oligolamellar (OLVs, 100-1000 nm)			Anionic	45.5 / 36.5 / 18	Yes	DCP							None			-60	ELS				5-7 (purified water)	25
17	Villasamil-Sanchez et al., 2010. Drug Development and Industrial Pharmacy	EPC/Chol/DCP	REV			Large unilamellar vehicles (LUVs, > 100 nm) and oligolamellar (OLVs, 100-1000 nm)			Anionic	42 / 33 / 25	Yes	DCP							None			-59	ELS				5-7 (purified water)	25
17	Villasamil-Sanchez et al., 2010. Drug Development and Industrial Pharmacy	EPC/Chol/SA	FAT			Not completed formation process			Cationic	50 / 40 / 10	Yes	SA							None			-48	ELS				5-7 (purified water)	25
17	Villasamil-Sanchez et al., 2010. Drug Development and Industrial Pharmacy	EPC/Chol/SA	FAT			Not completed formation process			Cationic	45.5 / 36.5 / 18	Yes	SA							None			-55	ELS				5-7 (purified water)	25
17	Villasamil-Sanchez et al., 2010. Drug Development and Industrial Pharmacy	EPC/Chol/SA	FAT			Not completed formation process			Cationic	42 / 33 / 25	Yes	SA							None			-65	ELS				5-7 (purified water)	25
17	Villasamil-Sanchez et al., 2010. Drug Development and Industrial Pharmacy	EPC/Chol/SA	FAT			Not completed formation process			Anionic	50 / 40 / 10	Yes	DCP							None			-55	ELS				5-7 (purified water)	25
17	Villasamil-Sanchez et al., 2010. Drug Development and Industrial Pharmacy	EPC/Chol/DCP	FAT			Not completed formation process			Anionic	49 / 39 / 12	Yes	DCP							None			-53	ELS				5-7 (purified water)	25
17	Villasamil-Sanchez et al., 2010. Drug Development and Industrial Pharmacy	EPC/Chol/DCP	FAT			Not completed formation process			Anionic	48 / 38 / 14	Yes	DCP							None			-62	ELS				5-7 (purified water)	25
17	Villasamil-Sanchez et al., 2010. Drug Development and Industrial Pharmacy	EPC/Chol/DCP	FAT			Not completed formation process			Anionic	45.5 / 36.5 / 18	Yes	DCP							None			-60	ELS				5-7 (purified water)	25
17	Villasamil-Sanchez et al., 2010. Drug Development and Industrial Pharmacy	EPC/Chol/DCP	FAT			Not completed formation process			Anionic	42 / 33 / 25	Yes	DCP							None			-69	ELS				5-7 (purified water)	25
18	Soni, A et al., 2021. Journal of Drug Delivery and Therapeutics	SPC/Chol/SA	TLE			Multilamellar vehicles (MLVs, > 500 nm)	940	DLS	Cationic	61 / 26 / 13	Yes	SA							Amphotericin B			28.38	ELS			DLS		25
19	Mishra et al., 2020. Journal of Drug Delivery Science and Technology	SPC/SA	TLE			Combination of uni, bi and multilamellar vesicles	144	DLS	Cationic	95 / 5	No	SA							Amphotericin B			-43	ELS		0.38	DLS			35
19	Mishra et al., 2020. Journal of Drug Delivery Science and Technology	SPC/SA	TLE			Combination of uni, bi and multilamellar vesicles	391	DLS	Cationic	91 / 9	No	SA							Amphotericin B			-3	ELS		0.35	DLS			62
19	Mishra et al., 2020. Journal of Drug Delivery Science and Technology	SPC/SA	TLE			Combination of uni, bi and multilamellar vesicles	140	DLS	Cationic	80 / 20	No	SA							Amphotericin B			32	ELS		0.24	DLS			83
19	Mishra et al., 2020. Journal of Drug Delivery Science and Technology	SPC/SA	TLE			Combination of uni, bi and multilamellar vesicles	202	DLS	Cationic	67 / 33	No	SA							Amphotericin B			63	ELS		0.39	DLS			71
20	Ingle et al., 2018. European Journal of Pharmaceutical Sciences	SPC/Chol/SA	TLE			Small unilamellar (SUV, 20-100 nm)	193.3	DLS	Cationic	9.13 / 1 / 5.18 mg	Yes	SA							Paclitaxel		4 mg	38.2	ELS		0.17	DLS	5-7 (purified water)	25	93.07
21	Jagwani et al., 2020. ACS Biomaterials Science and Engineering	SPC/Chol/SA	TLE			No information	153.33	DLS	Cationic	6 / 2 / 2.5 mg	Yes	SA							Resveratol		2000 (5 mg)	7.57	ELS						49.26	2.38
21	Jagwani et al., 2020. ACS Biomaterials Science and Engineering	SPC/Chol/SA	TLE			No information	140.3	DLS	Cationic	6 / 2 / 5 mg	Yes	SA							Resveratol		2000 (5 mg)	25.98	ELS						62.57	2.99
21	Jagwani et al., 2020. ACS Biomaterials Science and Engineering	SPC/Chol/SA	TLE			No information	134.73	DLS	Cationic	6 / 2 / 7 mg	Yes	SA							Resveratol		2000 (5 mg)	29.26	ELS						58.91	2.8
21	Jagwani et al., 2020. ACS Biomaterials Science and Engineering	SPC/Chol/SA	TLE			No information	176.43	DLS	Cationic	7 / 2 / 2.5 mg	Yes	SA							Resveratol		2000 (5 mg)	15.88	ELS						62.76	3.02
21	Jagwani et al., 2020. ACS Biomaterials Science and Engineering	SPC/Chol/SA	TLE			No information	145.78	DLS	Cationic	7 / 2 / 5 mg	Yes	SA							Resveratol		2000 (5 mg)	38.03	ELS						78.14	3.71
21	Jagwani et al., 2020. ACS Biomaterials Science and Engineering	SPC/Chol/SA	TLE			No information	138.18	DLS	Cationic	7 / 2 / 7.5 mg	Yes	SA							Resveratol		2000 (5 mg)	62.58	ELS						65.31	3.1
21	Jagwani et al., 2020. ACS Biomaterials Science and Engineering	SPC/Chol/SA	TLE			No information	187.54	DLS	Cationic	8 / 2 / 2.5 mg	Yes	SA							Resveratol		2000 (5 mg)	11.73	ELS						63.65	3.06
21	Jagwani et al., 2020. ACS Biomaterials Science and Engineering	SPC/Chol/SA	TLE			No information	152.46	DLS	Cationic	8 / 2 / 5 mg	Yes	SA							Resveratol		2000 (5 mg)	35	ELS						70.74	3.33
21	Jagwani et al., 2020. ACS Biomaterials Science and Engineering	SPC/Chol/SA	TLE			No information	148.91	DLS	Cationic	8 / 2 / 7.5 mg	Yes	SA							Resveratol		2000 (5 mg)	56.43	ELS						65.85	3.12
22	Nemeth et al., 2022. Pharmaceutics	EPC/Chol/SA	TLE			No information	121	DLS	Cationic	54 / 25 / 21	Yes	SA							None			22	ELS		0.22	DLS	5.6	25
22	Nemeth et al., 2022. Pharmaceutics	EPC/Chol/SA	TLE			No information	106	DLS	Cationic	36 / 21 / 43	Yes	SA							None			17.6	ELS		0.23	DLS	5.6	25
22	Nemeth et al., 2022. Pharmaceutics	EPC/Chol/SA	TLE			No information	116	DLS	Cationic	39 / 29 / 32	Yes	SA							None			24.6	ELS		0.23	DLS	5.6	25
22	Nemeth et al., 2022. Pharmaceutics	EPC/Chol/SA	TLE			No information	93	DLS	Cationic	44 / 16 / 40	Yes	SA							None			25	ELS		0.22	DLS	5.6	25
22	Nemeth et al., 2022. Pharmaceutics	EPC/Chol/SA	TLE			No information	113	DLS	Cationic	49 / 22 / 29	Yes	SA							None			25.8	ELS		0.23	DLS	5.6	25
22	Nemeth et al., 2022. Pharmaceutics	EPC/Chol/SA	TLE			No information	112	DLS	Cationic	54 / 30 / 16	Yes	SA							None			26.6	ELS		0.16	DLS	5.6	25
22	Nemeth et al., 2022. Pharmaceutics	EPC/Chol/SA	TLE			No information	111	DLS	Cationic	57 / 16 / 27	Yes	SA							None			26.3	ELS		0.19	DLS	5.6	25
22	Nemeth et al., 2022. Pharmaceutics	EPC/Chol/SA	TLE			No information	109	DLS	Cationic	62.5 / 22.5 / 15	Yes	SA							None			26.6	ELS		0.17	DLS	5.6	25
22	Nemeth et al., 2022. Pharmaceutics	EPC/Chol/SA	TLE			No information	100	DLS	Cationic	46.3 / 20.3 / 33.3	Yes	SA							None			27.1	ELS		0.17	DLS	5.6	25
22	Nemeth et al., 2022. Pharmaceutics	EPC/Chol/DCP	TLE			No information	98	DLS	Anionic	54 / 25 / 21	Yes	DCP							None			-29.9	ELS		0.2	DLS	5.6	25
22	Nemeth et al., 2022. Pharmaceutics	EPC/Chol/DCP	TLE			No information	82	DLS	Anionic	36 / 21 / 43	Yes	DCP							None			-29.6	ELS		0.24	DLS	5.6	25
22	Nemeth et al., 2022. Pharmaceutics	EPC/Chol/DCP	TLE			No information	108	DLS	Anionic	39 / 29 / 32	Yes	DCP							None			-32.5	ELS		0.21	DLS	5.6	25
22	Nemeth et al., 2022. Pharmaceutics	EPC/Chol/DCP	TLE			No information	87	DLS	Anionic	44 / 16 / 40	Yes	DCP							None			-32.6	ELS		0.24	DLS	5.6	25
22	Nemeth et al., 2022. Pharmaceutics	EPC/Chol/DCP	TLE			No information	93	DLS	Anionic	49 / 22 / 29	Yes	DCP							None			-29.7	ELS		0.23	DLS	5.6	25
22	Nemeth et al., 2022. Pharmaceutics	EPC/Chol/DCP	TLE			No information	119	DLS	Anionic	54 / 30 / 16	Yes	DCP							None			-29.7	ELS		0.21	DLS	5.6	25
22	Nemeth et al., 2022. Pharmaceutics	EPC/Chol/DCP	TLE			No information	95	DLS	Anionic	57 / 16 / 27	Yes	DCP							None			-29.2	ELS		0.18	DLS	5.6	25
22	Nemeth et al., 2022. Pharmaceutics	EPC/Chol/DCP	TLE			No information	104	DLS	Anionic	62.5 / 22.5 / 15	Yes	DCP							None			-27.6	ELS		0.18	DLS	5.6	25
22	Nemeth et al., 2022. Pharmaceutics	EPC/Chol/DCP	TLE			No information	105	DLS	Anionic	46.3 / 20.3 / 33.3	Yes	DCP							None			-17.7	ELS		0.18	DLS	5.6	25
23	De et al., 2020. Cancer Immunology, Immunotherapy	PA/STA/OA/LA/SA	TLE			No information	148	DLS	Cationic	28 / 11 / 26 / 13 / 22	No	SA							Dexorubicin		1000	43.1	ELS				7.4
24	Verma et al., 2019. Pharmaceutical Research	DSPC/Chol/SA	TLE	10		No information	184.3	DLS	Cationic	81 / 14 / 5	Yes	SA							Prednisolone; Mehrotrexate		5000; 5000 (10 mg; 10 mg)	3.45	ELS		2.23	DLS	5-7 (purified water)	25	37.45; 23.2
24	Verma et al., 2019. Pharmaceutical Research	DSPC/Chol/SA	TLE	10		No information	173.4	DLS	Cationic	76 / 19 / 5	Yes	SA							Prednisolone; Mehrotrexate		5000; 5000 (10 mg; 10 mg)	5.21	ELS		3.45	DLS	5-7 (purified water)	25	40.89; 26.5
24	Verma et al., 2019. Pharmaceutical Research	DSPC/Chol/SA	TLE	10		No information	167.3	DLS	Cationic	71 / 24 / 5	Yes	SA							Prednisolone; Mehrotrexate		5000; 5000 (10 mg; 10 mg)	6.3	ELS		0.085	DLS	5-7 (purified water)	25	42.3; 28.2
24	Verma et al., 2019. Pharmaceutical Research	DSPC/Chol/SA	TLE	10		No information	158.4	DLS	Cationic	66 / 29 / 5	Yes	SA							Prednisolone; Mehrotrexate		5000; 5000 (10 mg; 10 mg)	1.98	ELS		1.23	DLS	5-7 (purified water)	25	45.67; 29.5
24	Verma et al., 2019. Pharmaceutical Research	DSPC/Chol/SA	TLE	10		No information	192.3	DLS	Cationic	61 / 34 / 5	Yes	SA							Prednisolone; Mehrotrexate		5000; 5000 (10 mg; 10 mg)	3.89	ELS		3.23	DLS	5-7 (purified water)	25	38.91; 23.6
24	Verma et al., 2019. Pharmaceutical Research	DSPC/Chol/SA	TLE	10		No information	162.4	DLS	Cationic	71 / 24 / 5	Yes	SA							Prednisolone; Mehrotrexate		5000; 5000 (10 mg; 10 mg)	6.24	ELS		2.23	DLS	5-7 (purified water)	25	46.4; 31.1
24	Verma et al., 2019. Pharmaceutical Research	DSPC/Chol/SA	TLE	20		No information	158.7	DLS	Cationic	71 / 24 / 5	Yes	SA							Prednisolone; Mehrotrexate		5000; 5000 (10 mg; 10 mg)	6.91	ELS		3.45	DLS	5-7 (purified water)	25	43.2;27.4
24	Verma et al., 2019. Pharmaceutical Research	DSPC/Chol/SA	TLE	30		No information	150.6	DLS	Cationic	71 / 24 / 5	Yes	SA							Prednisolone; Mehrotrexate		5000; 5000 (10 mg; 10 mg)	6.34	ELS		0.085	DLS	5-7 (purified water)	25	38.1;26.3
24	Verma et al., 2019. Pharmaceutical Research	DSPC/Chol/SA	TLE	40		No information	147.4	DLS	Cationic	71 / 24 / 5	Yes	SA							Prednisolone; Mehrotrexate		5000; 5000 (10 mg; 10 mg)	6.88	ELS		1.23	DLS	5-7 (purified water)	25	33.5; 21.4
24	Verma et al., 2019. Pharmaceutical Research	DSPC/Chol/SA	TLE	50		No information	103.1	DLS	Cationic	71 / 24 / 5	Yes	SA							Prednisolone; Mehrotrexate		5000; 5000 (10 mg; 10 mg)	6.08	ELS		5.23	DLS	5-7 (purified water)	25	28.6; 18.6
25	He et al., 2020. AAPS PharmSciTech	EPC/Chol/SA	TLE			No information	219.7	DLS	Cationic	59 / 19 / 21	Yes	SA							Pemetrexed disodium	10:1		22.2	ELS		0.231	DLS		25	92.36	9.15
26	Narayan et al., 2016. Life Sciences	SPC/Chol	TLE			Multilamellar vehicles (MLVs, > 500 nm)	106.3	DLS	Neutral	66.6 / 33.3	Yes								Risperidone	5:1		-50.5	ELS					25	30.24
26	Narayan et al., 2016. Life Sciences	SPC/Chol	TLE			Multilamellar vehicles (MLVs, > 500 nm)	92.92	DLS	Neutral	80 / 20	Yes								Risperidone	5:1		-48.5	ELS					25	31
26	Narayan et al., 2016. Life Sciences	SPC/Chol	TLE			Multilamellar vehicles (MLVs, > 500 nm)	100.3	DLS	Neutral	89 / 11	Yes								Risperidone	5:1		-49.4	ELS					25	29.46
26	Narayan et al., 2016. Life Sciences	SPC/Chol	TLE			Multilamellar vehicles (MLVs, > 500 nm)	95.49	DLS	Neutral	66.6 / 33.3	Yes								Risperidone	7.5:1		-49.9	ELS					25	33.07
26	Narayan et al., 2016. Life Sciences	SPC/Chol	TLE			Multilamellar vehicles (MLVs, > 500 nm)	97.21	DLS	Neutral	80 / 20	Yes								Risperidone	7.5:1		-50.1	ELS					25	39.48
26	Narayan et al., 2016. Life Sciences	SPC/Chol	TLE			Multilamellar vehicles (MLVs, > 500 nm)	91.08	DLS	Neutral	89 / 11	Yes								Risperidone	7.5:1		-52.2	ELS					25	39.01
26	Narayan et al., 2016. Life Sciences	SPC/Chol	TLE			Multilamellar vehicles (MLVs, > 500 nm)	103.6	DLS	Neutral	66.6 / 33.3	Yes								Risperidone	10:1		-50.7	ELS					25	42.86
26	Narayan et al., 2016. Life Sciences	SPC/Chol	TLE			Multilamellar vehicles (MLVs, > 500 nm)	95.11	DLS	Neutral	80 / 20	Yes								Risperidone	10:1		-50	ELS					25	46.72
26	Narayan et al., 2016. Life Sciences	SPC/Chol	TLE			Multilamellar vehicles (MLVs, > 500 nm)	91.86	DLS	Neutral	89 / 11	Yes								Risperidone	10:1		-53.8	ELS					25	49.6
26	Narayan et al., 2016. Life Sciences	SPC/Chol/SA	TLE			Multilamellar vehicles (MLVs, > 500 nm)	124.01	DLS	Cationic	84 / 11 / 5	Yes	SA							Risperidone	10:1		16.8	ELS				8.65	25	47.18
26	Narayan et al., 2016. Life Sciences	SPC/Chol/SA	TLE			Multilamellar vehicles (MLVs, > 500 nm)	184.54	DLS	Cationic	80 / 10 / 10	Yes	SA							Risperidone	10:1		18.24	ELS				8.65	25	43.53
26	Narayan et al., 2016. Life Sciences	SPC/Chol/SA	TLE			Multilamellar vehicles (MLVs, > 500 nm)	209.03	DLS	Cationic	73 / 9 / 18	Yes	SA							Risperidone	10:1		22.42	ELS				8.65	25	43.65
26	Narayan et al., 2016. Life Sciences	SPC/Chol/SA	TLE			Multilamellar vehicles (MLVs, > 500 nm)	98.55	DLS	Cationic	86 / 11 / 3	Yes	SA							Risperidone	10:1		15.61	ELS				8.65	25	51.13
26	Narayan et al., 2016. Life Sciences	SPC/Chol/SA	TLE			Multilamellar vehicles (MLVs, > 500 nm)	115.54	DLS	Cationic	88.5 / 11 / 0.5	Yes	SA							Risperidone	10:1		-36.84	ELS				8.65	25	54.34
26	Narayan et al., 2016. Life Sciences	SPC/Chol/SA	TLE			Multilamellar vehicles (MLVs, > 500 nm)	108.02	DLS	Cationic	88 / 11 / 1	Yes	SA							Risperidone	10:1		-29.97	ELS				8.65	25	55.75
26	Narayan et al., 2016. Life Sciences	SPC/Chol/SA	TLE			Multilamellar vehicles (MLVs, > 500 nm)	98.51	DLS	Cationic	87 / 11 / 2	Yes	SA							Risperidone	10:1		-28.6	ELS				8.65	25	58.86
27	Rajendran et al., 2016. Antimicrobial Agents and Chemotherapy	SPC/Chol	TLE			Large unilamellar vehicles (LUVs, > 100 nm)	124	DLS	Neutral	70 / 30	Yes								Monensin	10:1	20 μmol	-11.6	ELS		0.28	DLS	7.4	25
27	Rajendran et al., 2016. Antimicrobial Agents and Chemotherapy	SPC/Chol/DSPE-mPEG 2000	TLE			Large unilamellar vehicles (LUVs, > 100 nm)	103	DLS	Neutral	69.5 / 30 / 0.5	Yes	DSPE-mPEG 2000							Monensin	10:1	20 μmol	-14.5	ELS		0.27	DLS	7.4	25
27	Rajendran et al., 2016. Antimicrobial Agents and Chemotherapy	SPC/Chol/DSPE-mPEG 2000	TLE			Small unilamellar (SUV, 20-100 nm)	96	DLS	Neutral	68.25 / 29.25 /2.5	Yes	DSPE-mPEG 2000							Monensin	10:1	20 μmol	-12.6	ELS		0.31	DLS	7.4	25
27	Rajendran et al., 2016. Antimicrobial Agents and Chemotherapy	SPC/Chol/DSPE-mPEG 2000	TLE			Small unilamellar (SUV, 20-100 nm)	90	DLS	Neutral	66.5 / 28.5 / 5	Yes	DSPE-mPEG 2000							Monensin	10:1	20 μmol	-8.8	ELS		0.28	DLS	7.4	25
27	Rajendran et al., 2016. Antimicrobial Agents and Chemotherapy	SPC/Chol/PA	TLE			Large unilamellar vehicles (LUVs, > 100 nm)	109	DLS	Anionic	63 / 27 / 10	Yes	PA							Monensin	10:1	20 μmol	-23.3	ELS		0.29	DLS	7.4	25
27	Rajendran et al., 2016. Antimicrobial Agents and Chemotherapy	SPC/Chol/PA/DSPE-mPEG 2000	TLE			Small unilamellar (SUV, 20-100 nm)	98	DLS	Anionic	69.5 / 30 / 0.5	Yes	PA							Monensin	10:1	20 μmol	-29.5	ELS		0.23	DLS	7.4	25
27	Rajendran et al., 2016. Antimicrobial Agents and Chemotherapy	SPC/Chol/PA/DSPE-mPEG 2000	TLE			Large unilamellar vehicles (LUVs, > 100 nm)	100	DLS	Anionic	68.25 / 29.25 /2.5	Yes	PA							Monensin	10:1	20 μmol	-18.4	ELS		0.22	DLS	7.4	25
27	Rajendran et al., 2016. Antimicrobial Agents and Chemotherapy	SPC/Chol/PA/DSPE-mPEG 2000	TLE			Small unilamellar (SUV, 20-100 nm)	98	DLS	Anionic	66.5 / 28.5 / 5	Yes	PA							Monensin	10:1	20 μmol	-12.7	ELS		0.22	DLS	7.4	25
27	Rajendran et al., 2016. Antimicrobial Agents and Chemotherapy	SPC/Chol/SA	TLE			Large unilamellar vehicles (LUVs, > 100 nm)	121	DLS	Cationic	63 / 27 / 10	Yes	SA							Monensin	10:1	20 μmol	43.9	ELS		0.25	DLS	7.4	25
27	Rajendran et al., 2016. Antimicrobial Agents and Chemotherapy	SPC/Chol/SA/DSPE-mPEG 2000	TLE			Large unilamellar vehicles (LUVs, > 100 nm)	107	DLS	Cationic	69.5 / 30 / 0.5	Yes	SA							Monensin	10:1	20 μmol	34.7	ELS		0.28	DLS	7.4	25
27	Rajendran et al., 2016. Antimicrobial Agents and Chemotherapy	SPC/Chol/SA/DSPE-mPEG 2000	TLE			Large unilamellar vehicles (LUVs, > 100 nm)	101	DLS	Cationic	68.25 / 29.25 /2.5	Yes	SA							Monensin	10:1	20 μmol	18.9	ELS		0.24	DLS	7.4	25
27	Rajendran et al., 2016. Antimicrobial Agents and Chemotherapy	SPC/Chol/SA/DSPE-mPEG 2000	TLE			Small unilamellar (SUV, 20-100 nm)	98	DLS	Cationic	66.5 / 28.5 / 5	Yes	SA							Monensin	10:1	20 μmol	15.1	ELS		0.27	DLS	7.4	25
28	Migliore et al., 2014. Neuroscience	DOPC/Chol/SA	TLE			No information	149	DLS	Cationic	59 / 35 / 6	Yes	SA							GDNF	1:50	2000	30	PALS				7.4		95
29	Migliore et al., 2010. Journal of Pharmaceutical Sciences	DOPC/Chol/SA	TLE			No information	299	DLS	Cationic	59 / 35 / 6	Yes	SA							Ovalbumin	1:50	2000; 1000	19	PALS				7.4		94.3
30	Vhora et al., 2018. AAPS PharmSciTech	SA/HSPC/DOPE/Chol	TLE			Small unilamellar (SUV, 20-100 nm)	94.7	DLS	Cationic	16.5 / 46.5 / 10 / 27	Yes	SA, DSPE-mPEG 2000							None			52.8	ELS		0.242	DLS
30	Vhora et al., 2018. AAPS PharmSciTech	SA/HSPC/DOPE/Chol/DSPE-mPEG 2000	TLE			Small unilamellar (SUV, 20-100 nm)	91.5	DLS	Cationic	16 / 42 / 10 / 29 / 3	Yes	SA, DSPE-mPEG 2000							None			31	ELS		0.226	DLS
31	Tran et al., 2019. International Journal of Nanomedicine	HSPC/CH/SA/DSPE-PEG200	TLE			Large unilamellar vehicles (LUVs, > 100 nm)	205	DLS	Cationic	55 / 35 / 3 / 7	Yes	SA, DCP							S-propargyl-cysteine		2663,8	45.6	PALS				5-7 (purified water)		30.3
31	Tran et al., 2019. International Journal of Nanomedicine	HSPC/CH/DCP/DSPE-PEG200	TLE			Large unilamellar vehicles (LUVs, > 100 nm)	190	DLS	Anionic	55 / 35 / 3 / 7	Yes	SA, DCP							S-propargyl-cysteine		2663,8	47.3	PALS				5-7 (purified water)		32.4
31	Tran et al., 2019. International Journal of Nanomedicine	HSPC/Chol/DSPE-PEG200/SA	TLE			Large unilamellar vehicles (LUVs, > 100 nm)	209	DLS	Cationic	55 / 35 / 3 / 7	Yes	SA, DCP							None			48.7	PALS				5-7 (purified water)
31	Tran et al., 2019. International Journal of Nanomedicine	HSPC/Chol/DSPE-PEG200/DP	TLE			Large unilamellar vehicles (LUVs, > 100 nm)	191	DLS	Anionic	55 / 35 / 3 / 7	Yes	SA, DCP							None			45.1	PALS				5-7 (purified water)
32	Sharma et al., 2017. International Journal of Pharmaceutics	SPC/Chol/SA	TLE			No information	76.5	DLS	Cationic	63 / 27 / 10	Yes	SA							None			32.9	PALS		0.209	DLS	5-7 (purified water)	25
32	Sharma et al., 2017. International Journal of Pharmaceutics	SPC/Chol	TLE			No information	92.5	DLS	Cationic	70 / 30	Yes								None			-1.91	PALS		0.205	DLS	5-7 (purified water)	25
32	Sharma et al., 2017. International Journal of Pharmaceutics	SPC/Chol/SA	TLE			Small unilamellar (SUV, 20-100 nm)	71.2	DLS	Cationic	63 / 27 / 10	Yes	SA							Anti-miR-191	1000:1	800	29.7	PALS		0.225	DLS	5-7 (purified water)	25
32	Sharma et al., 2017. International Journal of Pharmaceutics	SPC/Chol	TLE			No information	88.7	DLS	Cationic	70 / 30	Yes								Anti-miR-191	1000:1	800	-1.1	PALS		0.218	DLS	5-7 (purified water)	25
33	Caddeo et al., 2019. International Journal of Pharmaceutics	P90G/SA	Sonication			No information	81	DLS	Cationic	95 / 5	No	SA							None			17.5	ELS		0.24	DLS	7.4	25
33	Caddeo et al., 2019. International Journal of Pharmaceutics	P90G/SA	Sonication			Combination of uni, bi and trilamellar vesicles	82.6	DLS	Cationic	95 / 5	No	SA							Quercetin	25.5:1	5000	15.3	ELS		0.19	DLS	7.4	25	84.2
33	Caddeo et al., 2019. International Journal of Pharmaceutics	P90G/SA	Sonication			Combination of uni, bi and trilamellar vesicles	116	DLS	Cationic	95 / 5	No	SA				Eudragit S100	1000	126:1	Quercetin	25.5:1	5000	7.1	ELS		0.36	DLS	7.4	25
33	Caddeo et al., 2019. International Journal of Pharmaceutics	P90G/SA	Sonication			Small unilamellar (SUV, 20-100 nm), oligolamellar (OLVs, 100-1000 nm) and multilamellar	95.8	DLS	Cationic	95 / 5	No	SA				Eudragit S100	1000	126:1	None			6.5	ELS		0.27	DLS	7.4	25	83.7
33	Caddeo et al., 2019. International Journal of Pharmaceutics	P90G/SA	Sonication			Combination of uni, bi and trilamellar vesicles	96	DLS	Cationic	95 / 5	No	SA							Quercetin	25.5:1	5000	11.9	ELS	0	0.21	DLS	1.2	37
33	Caddeo et al., 2019. International Journal of Pharmaceutics	P90G/SA	Sonication			Combination of uni, bi and trilamellar vesicles	100	DLS	Cationic	95 / 5	No	SA							Quercetin	25.5:1	5000	11.6	ELS	2	0.2	DLS	1.2	37
33	Caddeo et al., 2019. International Journal of Pharmaceutics	P90G/SA	Sonication			Combination of uni, bi and trilamellar vesicles	83.5	DLS	Cationic	95 / 5	No	SA							Quercetin	25.5:1	5000	4.9	ELS	0	0.18	DLS	7	37
33	Caddeo et al., 2019. International Journal of Pharmaceutics	P90G/SA	Sonication			Combination of uni, bi and trilamellar vesicles	82	DLS	Cationic	95 / 5	No	SA							Quercetin	25.5:1	5000	4.9	ELS	6	0.18	DLS	7	37
33	Caddeo et al., 2019. International Journal of Pharmaceutics	P90G/SA	Sonication			Small unilamellar (SUV, 20-100 nm), oligolamellar (OLVs, 100-1000 nm) and multilamellar	95.5	DLS	Cationic	95 / 5	No	SA				Eudragit S100	1000	126:1	None			11.1	ELS	0	0.27	DLS	1.2	37
33	Caddeo et al., 2019. International Journal of Pharmaceutics	P90G/SA	Sonication			Small unilamellar (SUV, 20-100 nm), oligolamellar (OLVs, 100-1000 nm) and multilamellar	97	DLS	Cationic	95 / 5	No	SA				Eudragit S100	1000	126:1	None			9.7	ELS	2	0.26	DLS	1.2	37
33	Caddeo et al., 2019. International Journal of Pharmaceutics	P90G/SA	Sonication			Small unilamellar (SUV, 20-100 nm), oligolamellar (OLVs, 100-1000 nm) and multilamellar	96.7	DLS	Cationic	95 / 5	No	SA				Eudragit S100	1000	126:1	none			4	ELS	0	0.29	DLS	7	37
33	Caddeo et al., 2019. International Journal of Pharmaceutics	P90G/SA	Sonication			Small unilamellar (SUV, 20-100 nm), oligolamellar (OLVs, 100-1000 nm) and multilamellar	93.1	DLS	Cationic	95 / 5	No	SA				Eudragit S100	1000	126:1	None			4	ELS	6	0.28	DLS	7	37
34	De et al., 2017. Molecular Therapy: Nucleic Acids	PA/STA/OA/LA/SA	TLE			No information	146	DLS	Cationic	28 / 11 / 26 / 13 / 22	No	SA							None			52	ELS		0.2	DLS	7.4
35	Lotosh et al., 2019. Cell and Tissue Biology	SPC/SA	Extrusion			No information	140	DLS	Cationic	90 / 10	No	SA							None			11.4	ELS				7.4	37
36	Rahman et al., 2016. Drug Delivery	SPC/Chol/DCP	TLE			No information	318	DLS	Anionic	48 / 48 / 4	Yes	DCP							Tretinoin	1:0.00000028	0.25	-41.2	ELS		0.43	DLS		25
37	Kumar et al., 2019. Pharmacological Reports	SPC/Chol	TLE			No information	322	DLS	Anionic	86 / 14	Yes								Silymarin	6:1	10	-70.5	ELS		0.563	DLS	7.4	50	58.94	11.59
37	Kumar et al., 2019. Pharmacological Reports	SPC/Chol/DCP	TLE			No information	756	DLS	Anionic	70.5 / 12 / 17.5	Yes	DCP							Silymarin	6:1	10	-77.3	ELS		0.607	DLS	7.4	50	62.29	0.5
37	Kumar et al., 2019. Pharmacological Reports	SPC/Chol/DSPE-mPEG 2000	TLE			No information	146.9	DLS	Anionic	80.5 / 13.5 / 6	Yes	DSPE-mPEG 2000							Silymarin	6:1	10	-47.4	ELS		0.958	DLS	7.4	50	50.5	2.3
37	Kumar et al., 2019. Pharmacological Reports	SPC/Chol/SA	TLE			No information	1377	DLS	Anionic	80 / 13 / 7	Yes	SA							Silymarin	6:1	10	-64.7	ELS		0.767	DLS	7.4	50	44.72	0.14
38	Alomrani et al., 2019. Saudi Pharmaceutical Journal	SPC/Chol	TLE	2		No information	234	DLS	Anionic	77 / 23	Yes								5-fluorouracyl	1:1	10000	-2.3	ELS		0.26	DLS	7.4	25	37	2.5
38	Alomrani et al., 2019. Saudi Pharmaceutical Journal	SPC/Chol/Polysorbate80	TLE	2		No information	146	DLS	Anionic	72 / 24 / 4	Yes	Polysorbate80							5-fluorouracyl	1:1	10000	-7.5	ELS		0.23	DLS	7.4	25	46	4.8
38	Alomrani et al., 2019. Saudi Pharmaceutical Journal	SPC/Chol/Polysorbate80/DCP	TLE	2		No information	108	DLS	Anionic	69 / 23 / 4 / 4	Yes	Polysorbate80, DCP							5-fluorouracyl	1:1	10000	-16.3	ELS		0.31	DLS	7.4	25	42	3.1
38	Alomrani et al., 2019. Saudi Pharmaceutical Journal	SPC/Chol	TLE	5		No information	212	DLS	Cationic	77 / 23	Yes					Chitosan	2500	1:10	5-fluorouracyl	1:1	10000	6.1	ELS		0.42	DLS	5,5 - 6	25	45	4.2
38	Alomrani et al., 2019. Saudi Pharmaceutical Journal	SPC/Chol/Polysorbate80	TLE	5		No information	236	DLS	Cationic	72 / 24 / 4	Yes	Polysorbate80				Chitosan	2500	1:11	5-fluorouracyl	1:1	10000	8.3	ELS		0.33	DLS	5,5 - 6	25	55	6.1
38	Alomrani et al., 2019. Saudi Pharmaceutical Journal	SPC/Chol/Polysorbate80/DCP	TLE	5		No information	271	DLS	Cationic	69 / 23 / 4 / 4	Yes	Polysorbate80, DCP				Chitosan	2500	1:11	5-fluorouracyl	1:1	10000	14.7	ELS		0.4	DLS	5,5 - 6	25	51	5.6
39	Togami et al., 2019. International Journal of Pharmaceutics	HEPC/Chol/DSPE-mPEG 2000/DCP/DPPE	TLE, extrusion			Small unilamellar (SUV, 20-100 nm)	125	DLS	Anionic	63.3 / 18.2 / 9.1 / 9.1 / 0.2	Yes	DSPE-PEG2000, DCP, DPPE							FITC-dextran (10 kDa)	14:1	1000	-32	ELS		0.094	DLS	7.4	25
39	Togami et al., 2019. International Journal of Pharmaceutics	HEPC/Chol/DSPE-mPEG 2000/DCP/DPPE	TLE, extrusion			Small unilamellar (SUV, 20-100 nm)	125	DLS	Anionic	63.3 / 18.2 / 9.1 / 9.1 / 0.2	Yes	DSPE-PEG2000, DCP, DPPE							Rhodamine B	0.67:1	1000	-32	ELS		0.094	DLS	7.4	25
40	Togami et al., 2020. Drug Development and Industrial Pharmacy	EPC/Chol/DCP/DSPE	TLE, extrusion			Small unilamellar (SUV, 20-100 nm)	133	DLS	Anionic	60 / 20 / 10 / 10	Yes	DSPE-PEG2000, DCP							Indocyanine green / NBD-DPPE	1.1:1	1000	-27.8	ELS		0.099	DLS	7.4	25
40	Togami et al., 2020. Drug Development and Industrial Pharmacy	EPC/Chol/DCP	TLE, extrusion			Small unilamellar (SUV, 20-100 nm)	134	DLS	Anionic	70 / 20 / 10	Yes	DCP							Indocyanine green / NBD-DPPE	1.1:1	1000	-49.4	ELS		0.115	DLS	7.4	25
41	Calvo et al., 2020. Pharamceutics	EEPC/Chol/TS	TLE	3		No information	121.6	DLS	Anionic	62.5 / 33.5 / 4	Yes	TS (d-α-tocopherol succinate)							Berberine	1:6	2883	-38	ELS		0.25	DLS	7.4	25	14.1
42	Ethemoglu et al., 2017. Neuroscience	HSPC/DCP/Chol	TLE, sonification	3 x 5		Multilamellar vehicles (MLVs, > 500 nm)	194.6	DLS	Anionic	66.7 / 6.7 / 26.7	Yes	DCP							Resveratrol	0.06 : 1	5000	-32.6	ELS				5.5
43	Wolfram et al., 2014. Colloids and Surfaces B: Biointerfaces	SPC/Chol/DPPE	TLE		100	No information	112.7	DLS	Neutral	60 / 30 / 10	Yes	DPPE							None			-4.9	ELS		0.056	DLS	7.4
43	Wolfram et al., 2014. Colloids and Surfaces B: Biointerfaces	SPC/Chol/DPPE	TLE		80	No information	100.7	DLS	Neutral	60 / 30 / 10	Yes	DPPE							None			-5.1	ELS		0.058	DLS	7.4
43	Wolfram et al., 2014. Colloids and Surfaces B: Biointerfaces	SPC/Chol/DPPE	TLE		50	No information	76.3	DLS	Neutral	60 / 30 / 10	Yes	DPPE							None			-5.8	ELS		0.054	DLS	7.4
43	Wolfram et al., 2014. Colloids and Surfaces B: Biointerfaces	SPC/Chol/DPPE-mPEG 2000	TLE		100	No information	106.5	DLS	Neutral	60 / 30 / 10	Yes	DPPE-mPEG 2000							None			-10.9	ELS		0.041	DLS	7.4
43	Wolfram et al., 2014. Colloids and Surfaces B: Biointerfaces	SPC/Chol/DPPE-mPEG 2000	TLE		80	No information	95.7	DLS	Neutral	60 / 30 / 10	Yes	DPPE-mPEG 2000							None			-10.8	ELS		0.035	DLS	7.4
43	Wolfram et al., 2014. Colloids and Surfaces B: Biointerfaces	SPC/Chol/DPPE-mPEG 2000	TLE		50	No information	72.8	DLS	Neutral	60 / 30 / 10	Yes	DPPE-mPEG 2000							None			-9.3	ELS		0.034	DLS	7.4
44	Menon, P. et al.,. 2015. Colloids and Surfaces A: Physicochemical and Engineering Aspects	SPC	TLE			No information	85.1	DLS	Zwitterion	100	No					None			None			-5.8	ELS		0.3	DLS		25
44	Menon, P. et al.,. 2015. Colloids and Surfaces A: Physicochemical and Engineering Aspects	SPC	TLE			No information	104.7	DLS	Zwitterion	100	No					Diethylaminoethyl-dextran–doxorubicin	50		None			1.82	ELS		0.4	DLS		25
44	Menon, P. et al.,. 2015. Colloids and Surfaces A: Physicochemical and Engineering Aspects	SPC	TLE			No information		DLS	Zwitterion	100	No					Diethylaminoethyl-dextran–doxorubicin	100		None			6.58	ELS					25
44	Menon, P. et al.,. 2015. Colloids and Surfaces A: Physicochemical and Engineering Aspects	SPC	TLE			No information		DLS	Zwitterion	100	No					Diethylaminoethyl-dextran–doxorubicin	150		None			11.6	ELS					25
44	Menon, P. et al.,. 2015. Colloids and Surfaces A: Physicochemical and Engineering Aspects	SPC	TLE			No information		DLS	Zwitterion	100	No					Diethylaminoethyl-dextran–doxorubicin	250		None			15.3	ELS					25
45	Mazotta, E. et al., 2024. Pharamceutics	DSPC/DSPG/Chol	TLE			Small unilamellar (SUV, 20-100 nm), multilamellar vehicles (MLVs, > 500 nm)	80.1	DLS	Neutral	60 / 7 / 33	Yes					None			None			-20.9	ELS		0.233	DLS	7.4	25
45	Mazotta, E. et al., 2024. Pharamceutics	DSPC/PG/Chol	TLE			Small unilamellar (SUV, 20-100 nm), multilamellar vehicles (MLVs, > 500 nm)	157.4	DLS	Neutral	60 / 7 / 33	Yes					Chitosan		1:10	None			-29.2	ELS		0.349	DLS	7.4	25
45	Mazotta, E. et al., 2024. Pharamceutics	DSPC/PG/Chol	TLE			Small unilamellar (SUV, 20-100 nm), multilamellar vehicles (MLVs, > 500 nm)	92.58	DLS	Neutral	60 / 7 / 33	Yes					Folic acid–L-cysteine–thiolated chitosan (1:1)		1:10	None			32.3	ELS		0.306	DLS	7.4	25
45	Mazotta, E. et al., 2024. Pharamceutics	DSPC/PG/Chol	TLE			Small unilamellar (SUV, 20-100 nm), multilamellar vehicles (MLVs, > 500 nm)	120.9	DLS	Neutral	60 / 7 / 33	Yes					Folic acid–L-cysteine–thiolated chitosan (1:2)		1:10	None			27.8	ELS		0.222	DLS	7.4	25
45	Mazotta, E. et al., 2024. Pharamceutics	DSPC/PG/Chol	TLE			Small unilamellar (SUV, 20-100 nm), multilamellar vehicles (MLVs, > 500 nm)	103.6	DLS	Neutral	60 / 7 / 33	Yes					Folic acid–L-cysteine–thiolated chitosan (1:3)		1:10	None			31.2	ELS		0.28	DLS	7.4	25
45	Mazotta, E. et al., 2024. Pharamceutics	DSPC/PG/Chol	TLE			Small unilamellar (SUV, 20-100 nm), multilamellar vehicles (MLVs, > 500 nm)	57.35	DLS	Neutral	60 / 7 / 33	Yes					None			Calcein			11.5	ELS		0.221	DLS	7.4	25
45	Mazotta, E. et al., 2024. Pharamceutics	DSPC/PG/Chol	TLE			Small unilamellar (SUV, 20-100 nm), multilamellar vehicles (MLVs, > 500 nm)	135.2	DLS	Neutral	60 / 7 / 33	Yes					Chitosan		1:10	Calcein			29.6	ELS		0.281	DLS	7.4	25
45	Mazotta, E. et al., 2024. Pharamceutics	DSPC/PG/Chol	TLE			Small unilamellar (SUV, 20-100 nm), multilamellar vehicles (MLVs, > 500 nm)	104.2	DLS	Neutral	60 / 7 / 33	Yes					Folic acid–L-cysteine–thiolated chitosan (1:1)		1:10	Calcein			38.2	ELS		0.334	DLS	7.4	25
45	Mazotta, E. et al., 2024. Pharamceutics	DSPC/PG/Chol	TLE			Small unilamellar (SUV, 20-100 nm), multilamellar vehicles (MLVs, > 500 nm)	89.37	DLS	Neutral	60 / 7 / 33	Yes					Folic acid–L-cysteine–thiolated chitosan (1:2)		1:10	Calcein			17.8	ELS		0.267	DLS	7.4	25
45	Mazotta, E. et al., 2024. Pharamceutics	DSPC/PG/Chol	TLE			Small unilamellar (SUV, 20-100 nm), multilamellar vehicles (MLVs, > 500 nm)	83.12	DLS	Neutral	60 / 7 / 33	Yes					Folic acid–L-cysteine–thiolated chitosan (1:3)		1:10	Calcein			17.7	ELS		0.352	DLS	7.4	25
45	Mazotta, E. et al., 2024. Pharamceutics	DSPC/PG/Chol	TLE			Small unilamellar (SUV, 20-100 nm), multilamellar vehicles (MLVs, > 500 nm)	134.1	DLS	Neutral	60 / 7 / 33	Yes					None			Dexorubicin			14.1	ELS		0.26	DLS	7.4	25
45	Mazotta, E. et al., 2024. Pharamceutics	DSPC/PG/Chol	TLE			Small unilamellar (SUV, 20-100 nm), multilamellar vehicles (MLVs, > 500 nm)	400.9	DLS	Neutral	60 / 7 / 33	Yes					Chitosan		1:10	Dexorubicin			25.6	ELS		0.38	DLS	7.4	25
45	Mazotta, E. et al., 2024. Pharamceutics	DSPC/PG/Chol	TLE			Small unilamellar (SUV, 20-100 nm), multilamellar vehicles (MLVs, > 500 nm)	162.5	DLS	Neutral	60 / 7 / 33	Yes					Folic acid–L-cysteine–thiolated chitosan (1:1)		1:10	Dexorubicin			29.5	ELS		0.326	DLS	7.4	25
45	Mazotta, E. et al., 2024. Pharamceutics	DSPC/PG/Chol	TLE			Small unilamellar (SUV, 20-100 nm), multilamellar vehicles (MLVs, > 500 nm)	225.04	DLS	Neutral	60 / 7 / 33	Yes					Folic acid–L-cysteine–thiolated chitosan (1:2)		1:10	Dexorubicin			21.5	ELS		0.324	DLS	7.4	25
45	Mazotta, E. et al., 2024. Pharamceutics	DSPC/PG/Chol	TLE			Small unilamellar (SUV, 20-100 nm), multilamellar vehicles (MLVs, > 500 nm)	159.92	DLS	Neutral	60 / 7 / 33	Yes					Folic acid–L-cysteine–thiolated chitosan (1:3)		1:10	Dexorubicin			27.9	ELS		0.205	DLS	7.4	25
