# Supplementary material
Source: Royal Society of Chemistry journal article supplement (doi:10.1039/d6nr00249h)
Supplement: d6nr00249h2.xlsx [file d6nr00249h2.xlsx]

## Sheet: Title
Expanding the Applicability of a Multicomponent Nano-Quantitative Structure-Property Relationships Approach from Hard to Soft Nanomaterials: Predicting the Stability of Liposomes
Kamila Jarzynskaa, Krzesimir Ciura*b, Alicja Mikolajczyka and Tomasz Puzyn*a
aLaboratory of Environmental Chemoinformatics, Faculty of Chemistry, University of Gdansk, Wita Stwosza 63, 80-308, Gdansk, Poland.
bDepartment of Physical Chemistry, Faculty of Pharmacy, Medical University of Gdansk, J. Hallera Avenue 107, 80-416, Gdansk, Poland.
*krzesimir.ciura@gumed.edu.pl, tomasz.puzyn@ug.edu.pl

## Sheet: Guide
Table S1. Characterization of individual lipid structures
Figure S1. Statistical parameters used in this study
Table S2. Characterization of 34 liposomal formulations used in the study
Table S3. Comprehensive set of molecular descriptors computed for specific lipids
Table S4. Nanodescriptors and hyperparameters employed to calibrate the optimal nano-QSPR models
Table S5. Performance of the optimal nano-QSPR models

## Sheet: Table S1
Table S1. Characterization of individual lipid structures
No.	Abbr.	Name	CAS	pH	Charge	Temperature [°C]	Structural formula	SMILES
1	SA	Stearylamine	124-30-1	7.4-7.7	Positive	25	#VALUE!	CCCCCCCCCCCCCCCCCCN
2	DOTAP	1,2-Dioleoyl-3-trimethylammonium-propane	132172-61-3	7.4-7.7	Positive	25	#VALUE!	CCCCCCCC/C=C\CCCCCCCC(=O)OCC(C[N+](C)(C)C)OC(=O)CCCCCCC/C=C\CCCCCCCC
3	DSPG	1,2-Distearoyl-sn-glycero-3-phospho-(1′-rac-glycerol)	200880-42-8	7.4-7.7	Negative	25	#VALUE!	[P](=O)([O-])(OC[C@H](OC(=O)CCCCCCCCCCCCCCCCC)COC(=O)CCCCCCCCCCCCCCCCC)OCC(O)CO
4	DOPE	1,2-Dioleoyl-sn-glycero-3-phosphoethanolamine	4004-05-1	7.4-7.7	Neutral (zwitterion)	25	#VALUE!	CCCCCCCC/C=C\CCCCCCCC(=O)OC[C@H](COP(=O)(O)OCCN)OC(=O)CCCCCCC/C=C\CCCCCCCC
5	Chol	Cholesterol	57-88-5	7.4-7.7	Neutral	25	#VALUE!	C[C@H](CCCC(C)C)[C@H]1CC[C@@H]2[C@@]1(CC[C@H]3[C@H]2CC=C4[C@@]3(CC[C@@H](C4)O)C)C
6	DSPC	1,2-Distearoyl-sn-glycero-3-phosphocholine	816-94-4	7.4-7.7	Neutral (zwitterion)	25	#VALUE!	O=C(OC[C@@H](OC(=O)CCCCCCCCCCCCCCCCC)COP(=O)([O-])OCC[N+](C)(C)C)CCCCCCCCCCCCCCCCC
7	DOPS	1,2-Dioleoyl-sn-glycero-3-phospho-L-serine	90693-88-2	7.4-7.7	Negative	25	#VALUE!	[O-]C([C@@H](N)COP(OC[C@@H](COC(CCCCCCC/C=C\CCCCCCCC)=O)OC(CCCCCCC/C=C\CCCCCCCC)=O)(O)=O)=O
8	DPPE	1,2-Dipalmitoyl-sn-glycero-3-phosphoethanolamine	923-61-5	7.4-7.7	Neutral (zwitterion)	25	#VALUE!	O=P(OC[C@H](OC(=O)CCCCCCCCCCCCCCCC)COC(=O)CCCCCCCCCCCCCCCC)(OCCN)O
9	SPC	Soy phosphatidylcholine (soybean lecithin)	97281-47-5	7.4-7.7	Neutral (zwitterion)	25	#VALUE!	O=C(OCC(OC(=O)CCCCCCCC=CCC=CCCCCC)COP(=O)([O-])OCC[N+](C)(C)C)CCCCCCCCCCCCCCC
10	TMAG	N-(α-trimethylammonioacetyl)-distearoyl-D-glutamate	NA	7.4-7.7	Positive	25	#VALUE!	CCCCCCCCCCCCCCCCCCOC(=O)CC[C@@H](NC(=O)C[N+](C)(C)C)C(=O)OCCCCCCCCCCCCCCCCCC
11	Chol I	Cholesteryl-3β-oxysuccinamidoethyldimethylamine	NA	7.4-7.7	Positive	25	#VALUE!	C[C@H](CC[C@H]1CC[C@@H]2[C@@H]3CC=C4C[C@@H](CC[C@]4(C)C3CCC12C)OCC(=O)CC(=O)NCCN(C)C)
12	Chol II	Cholesteryl-3β-oxycarboxyamidoethylenedimethylamine	NA	7.4-7.7	Positive	25	#VALUE!	C[C@H](CC[C@H]1CC[C@@H]2[C@@H]3CC=C4C[C@@H](CC[C@]4(C)C3CCC12C)OC(=O)NCCN(C)C)
13	Chol II (ethyl-)	Cholesteryl-3β-oxycarboxyamidoethylenediethylamine	NA	7.4-7.7	Positive	25	#VALUE!	C[C@H](CC[C@H]1CC[C@@H]2[C@@H]3CC=C4C[C@@H](CC[C@]4(C)C3CCC12C)OC(=O)NCCN(CC)CC)
14	Chol II (isopropyl-)	Cholesteryl-3β-oxycarboxyamidoethylenediisopropylamine	NA	7.4-7.7	Positive	25	#VALUE!	C[C@H](CC[C@H]1CC[C@@H]2[C@@H]3CC=C4C[C@@H](CC[C@]4(C)C3CCC12C)OC(=O)NCCN(C(C)C)C(C)C)
15	Chol III	Cholesteryl-3β-oxycarboxyamidopropanedimethylamine	NA	7.4-7.7	Positive	25	#VALUE!	C[C@H](CC[C@H]1CC[C@@H]2[C@@H]3CC=C4C[C@@H](CC[C@]4(C)C3CCC12C)OC(=O)NCCCN(C)C)
16	Chol IV	Cholesteryl-3β-carboxyamidoethylenedimethylamine	NA	7.4-7.7	Positive	25	#VALUE!	C[C@H](CC[C@H]1CC[C@@H]2[C@@H]3CC=C4C[C@@H](CC[C@]4(C)C3CCC12C)C(=O)NCCN(C)C)
17	Chol IV (ethyl-)	Cholesteryl-3β-carboxyamidoethylenediethylamine	NA	7.4-7.7	Positive	25	#VALUE!	C[C@H](CC[C@H]1CC[C@@H]2[C@@H]3CC=C4C[C@@H](CC[C@]4(C)C3CCC12C)C(=O)NCCN(CC)CC)
18	Chol V	Cholesteryl-3β-carboxyamidopropanedimethylamine	NA	7.4-7.7	Positive	25	#VALUE!	C[C@H](CC[C@H]1CC[C@@H]2[C@@H]3CC=C4C[C@@H](CC[C@]4(C)C3CCC12C)C(=O)NCCCN(C)C)

## Sheet: Figure S1
Figure S1. Statistical parameters used in this study

## Sheet: Table S2
Table S2. Characterization of 34 liposomal formulations used in the study
Formulation	Source	Preperation method	Zeta potential [mV]	Zeta potential measurement method	Lipid molar fractions [% mol]																		Set
					SA	DOTAP	DSPG	DOPE	Chol	DSPC	DOPS	DPPE	SPC	TMAG	Chol I	Chol II	Chol II (ethyl-)	Chol II (isopropyl-)	Chol III	Chol IV	Chol IV (ethyl-)	Chol V
1	Taylor et al.., 2007, Food Biophysics	TLE, thermal cycling, extrusion	-72.6	ELS	0	0	0.4	0	0	0.6	0	0	0	0	0	0	0	0	0	0	0	0	T
2	Taylor et al.., 2007, Food Biophysics	TLE, thermal cycling, extrusion	-52.28	ELS	0	0	0.2	0	0	0.8	0	0	0	0	0	0	0	0	0	0	0	0	T
3	Hohokabe et al., 2023, Colloids and Surfaces A: Physicochemical and Engineering Aspects 662	TLE, extrusion	-50.4	ELS	0	0	0.9	0	0	0	0	0	0	0.1	0	0	0	0	0	0	0	0	T
4	Hohokabe et al., 2023, Colloids and Surfaces A: Physicochemical and Engineering Aspects 663	TLE, extrusion	-47.9	ELS	0	0	0.8	0	0	0	0	0	0	0.2	0	0	0	0	0	0	0	0	T
5	Smith et al., 2017, Anal Bioanal Chem	TLE, microfluidization	-45	PALS	0	0	0	0	0.313	0.618	0.069	0	0	0	0	0	0	0	0	0	0	0	T
6	Smith et al., 2017, Anal Bioanal Chem	TLE, microfluidization	-45	PALS	0	0	0	0	0.357	0.552	0.091	0	0	0	0	0	0	0	0	0	0	0	T
7	Hohokabe et al., 2023, Colloids and Surfaces A: Physicochemical and Engineering Aspects 664	TLE, extrusion	-41	ELS	0	0	0.7	0	0	0	0	0	0	0.3	0	0	0	0	0	0	0	0	T
8	Hohokabe et al., 2023, Colloids and Surfaces A: Physicochemical and Engineering Aspects 665	TLE, extrusion	-37.3	ELS	0	0	0.6	0	0	0	0	0	0	0.4	0	0	0	0	0	0	0	0	T
9	Smith et al., 2017, Anal Bioanal Chem	TLE, microfluidization	-35	PALS	0	0	0	0	0.396	0.546	0.058	0	0	0	0	0	0	0	0	0	0	0	V
10	Smith et al., 2017, Anal Bioanal Chem	TLE, microfluidization	-27	PALS	0	0	0	0	0.351	0.617	0.032	0	0	0	0	0	0	0	0	0	0	0	T
11	Smith et al., 2017, Anal Bioanal Chem	TLE, microfluidization	-23	PALS	0	0	0	0	0.34	0.623	0.037	0	0	0	0	0	0	0	0	0	0	0	T
12	Mazzotta, E. et al., 2024. Pharamceutics	TLE	-20.9	ELS	0	0	0.07	0	0.33	0.6	0	0	0	0	0	0	0	0	0	0	0	0	V
13	Wolfram et al., 2014. Colloids and Surfaces B: Biointerfaces	TLE	-5.1	ELS	0	0	0	0	0.3	0	0	0.1	0.6	0	0	0	0	0	0	0	0	0	T
14	Takeuchi et al., 1996, FEBS Letters	TLE	9	ELS	0	0	0	0.6	0	0	0	0	0	0	0	0	0.4	0	0	0	0	0	T
15	Smith et al., 2017, Anal Bioanal Chem	TLE, microfluidization	11	PALS	0	0.022	0	0	0.363	0.615	0	0	0	0	0	0	0	0	0	0	0	0	T
16	Takeuchi et al., 1996, FEBS Letters	TLE	11.1	ELS	0	0	0	0.6	0	0	0	0	0	0	0	0	0	0.4	0	0	0	0	T
17	Takeuchi et al., 1996, FEBS Letters	TLE	12.6	ELS	0	0	0	0.6	0	0	0	0	0	0	0.4	0	0	0	0	0	0	0	V
18	Smith et al., 2017, Anal Bioanal Chem	TLE, microfluidization	14	PALS	0	0.034	0	0	0.391	0.575	0	0	0	0	0	0	0	0	0	0	0	0	T
19	Smith et al., 2017, Anal Bioanal Chem	TLE, microfluidization	14	PALS	0	0.032	0	0	0.361	0.607	0	0	0	0	0	0	0	0	0	0	0	0	T
20	Smith et al., 2017, Anal Bioanal Chem	TLE, microfluidization	15	PALS	0	0.028	0	0	0.355	0.617	0	0	0	0	0	0	0	0	0	0	0	0	T
21	Takeuchi et al., 1996, FEBS Letters	TLE	22.2	ELS	0	0	0	0.6	0	0	0	0	0	0	0	0	0	0	0	0	0.4	0	T
22	Smith et al., 2017, Anal Bioanal Chem	TLE, microfluidization	25	PALS	0	0.059	0	0	0.375	0.566	0	0	0	0	0	0	0	0	0	0	0	0	T
23	Smith et al., 2017, Anal Bioanal Chem	TLE, microfluidization	25	PALS	0	0.05	0	0	0.344	0.606	0	0	0	0	0	0	0	0	0	0	0	0	V
24	Smith et al., 2017, Anal Bioanal Chem	TLE, microfluidization	26	PALS	0	0.046	0	0	0.361	0.593	0	0	0	0	0	0	0	0	0	0	0	0	T
25	Takeuchi et al., 1996, FEBS Letters	TLE	26.5	ELS	0	0	0	0.6	0	0	0	0	0	0	0	0.4	0	0	0	0	0	0	V
26	Takeuchi et al., 1996, FEBS Letters	TLE	27.5	ELS	0	0	0	0.6	0	0	0	0	0	0	0	0	0	0	0.4	0	0	0	T
27	Takeuchi et al., 1996, FEBS Letters	TLE	27.5	ELS	0	0	0	0.6	0	0	0	0	0	0	0	0	0	0	0	0	0	0.4	V
28	Takeuchi et al., 1996, FEBS Letters	TLE	33.6	ELS	0	0	0	0.6	0	0	0	0	0	0	0	0	0	0	0	0.4	0	0	T
29	Smith et al., 2017, Anal Bioanal Chem	TLE, microfluidization	34	PALS	0	0.075	0	0	0.345	0.58	0	0	0	0	0	0	0	0	0	0	0	0	T
30	Hohokabe et al., 2023, Colloids and Surfaces A: Physicochemical and Engineering Aspects 667	TLE, extrusion	35.4	ELS	0	0	0.2	0	0	0	0	0	0	0.8	0	0	0	0	0	0	0	0	V
31	Hohokabe et al., 2023, Colloids and Surfaces A: Physicochemical and Engineering Aspects 666	TLE, extrusion	38.3	ELS	0	0	0.3	0	0	0	0	0	0	0.7	0	0	0	0	0	0	0	0	T
32	Hohokabe et al., 2023, Colloids and Surfaces A: Physicochemical and Engineering Aspects 668	TLE, extrusion	41.4	ELS	0	0	0.1	0	0	0	0	0	0	0.9	0	0	0	0	0	0	0	0	T
33	Vhora et al., 2018. AAPS PharmSciTech	TLE	52.8	ELS	0.165	0	0	0.1	0.27	0.465	0	0	0	0	0	0	0	0	0	0	0	0	T
34	Elsana et al., 2019. Scientific Reports	TLE	56	ELS	0	0.4	0	0.4	0.2	0	0	0	0	0	0	0	0	0	0	0	0	0	V

## Sheet: Table S3
Table S3. Comprehensive set of molecular descriptors computed for specific lipids
Lipid	Molar mass	Atom count	Heavy atom count	Asymmetric atom count	Rotatable bond count	Ring count	FSP3	Hydrogen bond donor count	Hydrogen bond acceptor count	Topological polar surface area	Polarizability	Molar refractivity	Van der Waals Volume (A^3)	Van der Waals Surface Area (A^2)	Solvent Accessible Surface Area (A^2)	Minimum Projection Area (A^2)	Maximum Projection Area (A^2)	Minimum projection radius (A)	Maximum projection radius (A)	iLOGP	XLOGP3	WLOGP	MLOGP	Silicos-IT Log P	Consensus Log P	ESOL Log S	ESOL Solubility (mg/ml)	ESOL Solubility (mol/l)	Ali Log S	Ali Solubility (mg/ml)	Ali Solubility (mol/l)	Silicos-IT LogSw	Silicos-IT Solubility (mg/ml)	Silicos-IT Solubility (mol/l)	log Kp (cm/s)	MaxAbsEStateIndex	MaxEStateIndex	MinAbsEStateIndex	MinEStateIndex	NumValenceElectrons	NumRadicalElectrons	MaxPartialCharge	MinPartialCharge	MaxAbsPartialCharge	MinAbsPartialCharge	FpDensityMorgan1	FpDensityMorgan2	FpDensityMorgan3	BCUT2D_MWHI
SA	269.517	58	19	0	16	0	1	1	1	26.02	35.51	88.21	328.88	596.79	721.74	39.23	114.83	4.33	13.59	5.12	4.30	6.21	4.93	6.30	5.37	-3.16	1.85e-01	6.86e-04	-4.56	7.43e-03	2.76e-05	-6.79	4.37e-05	1.62e-07	-4.89	5.48277	5.48277	0.873457	0.873457	116	0	-0.00772755	-0.330474	0.330474	0.00772755	0.421053	0.684211	0.947368	14.5091
DOTAP	663.104	127	47	1	37	0	0.86	0	2	52.6	80.64	215.98	751.08	1319.95	1387.21	142.96	215.09	9.62	11.97	5.12	4.30	12.22	4.93	6.30	5.37	-3.16	1.85e-01	6.86e-04	-4.56	7.43e-03	2.76e-05	-6.79	4.37e-05	1.62e-07	-4.89	12.5637	12.5637	0.15034	-0.399361	276	0	0.305901	-0.461471	0.461471	0.305901	0.489362	0.829787	1.21277	16.5826
DSPG	779.09	136	53	2	44	0	0.95	3	6	148.82	85.97	213.71	820.38	1453.27	1632.34	101	235.53	7.74	15.74	9.29	14.35	11.45	5.07	12.99	10.63	-10.81	1.22e-08	1.56e-11	-17.77	1.31e-15	1.68e-18	-11.91	9.58e-10	1.23e-12	-0.86	12.5817	12.5817	0.176642	-4.85714	316	0	0.305766	-0.756119	0.756119	0.305766	0.509434	0.830189	1.18868	31.2047
DOPE	744.048	129	51	1	41	0	0.85	2	5	134.38	83.91	211.64	783.21	1363.39	1561.06	147.69	234.87	10.98	13.04	9.29	14.35	11.61	5.07	12.99	10.63	-10.81	1.22e-08	1.56e-11	-17.77	1.31e-15	1.68e-18	-11.91	9.58e-10	1.23e-12	-0.86	12.5465	12.5465	0.0518347	-4.37444	300	0	0.471859	-0.461628	0.471859	0.461628	0.568627	0.960784	1.39216	31.2047
Chol	386.664	74	28	8	5	4	0.93	1	1	20.23	47.98	120.62	427.95	722.3	599.74	52.06	125.11	4.91	10.24	4.89	8.72	7.39	6.34	6.40	6.75	-7.40	1.54e-05	3.97e-08	-9.02	3.65e-07	9.45e-10	-5.78	6.48e-04	1.67e-06	-2.47	10.2098	10.2098	0.0765916	-0.0765916	160	0	0.0577401	-0.392797	0.392797	0.0577401	1	1.78571	2.53571	16.2659
DSPC	791.168	143	54	1	44	0	0.95	1	4	108.36	89.86	235.39	853.5	1530.73	1617.25	162.11	273.52	16.21	17.51	5.76	15.70	12.80	2.48	11.25	9.60	-11.73	1.47e-09	1.85e-12	-18.32	3.75e-16	4.74e-19	-14.21	4.89e-12	6.18e-15	0.02	12.669	12.669	0.0256289	-4.61502	322	0	0.305766	-0.756117	0.756117	0.305766	0.5	0.833333	1.18519	31.2047
DOPS	788.057	132	54	2	42	0	0.83	3	7	171.68	86.29	217.47	810.93	1395.39	1538.81	165.9	223.88	12.51	13.11	5.76	15.70	11.06	2.48	11.25	9.60	-11.73	1.47e-09	1.85e-12	-18.32	3.75e-16	4.74e-19	-14.21	4.89e-12	6.18e-15	0.02	12.5922	12.5922	0.144119	-4.7426	316	0	0.471882	-0.548357	0.548357	0.471882	0.574074	0.944444	1.37037	31.2047
DPPE	720.026	127	49	1	41	0	0.95	2	5	134.38	80.72	200.21	762.44	1359.9	1546.53	95.81	242.62	8.42	24.12	7.91	11.35	11.28	5.33	12.18	9.61	-8.75	1.28e-06	1.78e-09	-14.36	3.16e-12	4.39e-15	-11.94	8.36e-10	1.16e-12	-2.63	12.5348	12.5348	0.0579221	-4.36313	292	0	0.471859	-0.461628	0.471859	0.461628	0.530612	0.877551	1.2449	31.2047
SPC	759.082	133	52	1	40	0	0.86	1	4	108.36	85.69	228.42	803.13	1409.49	1591.69	156.66	231.64	12.28	14.58	4.21	13.00	11.58	1.98	10.02	8.16	-10.10	6.08e-08	8.01e-11	-15.52	2.28e-13	3.00e-16	-12.01	7.40e-10	9.75e-13	-1.70	12.6342	12.6342	0.0320755	-4.62072	306	0	0.305766	-0.756117	0.756117	0.305766	0.596154	1.03846	1.55769	31.2047
TMAG	752.242	144	53	1	43	0	0.93	1	3	81.7	89.67	236.19	845.21	1517.85	1684.22	150.09	247.36	11.22	22.92	6.28	17.43	12.57	3.16	12.49	10.39	-12.58	1.98e-10	2.63e-13	-19.35	3.33e-17	4.43e-20	-15.75	1.33e-13	1.77e-16	1.49	12.9491	12.9491	0.0856409	-0.834993	314	0	0.32815	-0.465674	0.465674	0.32815	0.45283	0.754717	1.07547	16.5381
Chol I	500.768	88	36	7	11	4	0.87	1	4	58.64	58.17	147.79	525.54	891.39	800.79	81.63	140.04	6.47	10.13	5.24	6.73	5.78	3.83	5.65	5.45	-6.39	2.03e-04	4.05e-07	-7.77	8.58e-06	1.71e-08	-6.79	8.18e-05	1.63e-07	-4.58	12.3422	12.3422	0.0543858	-0.200022	203	1	0.22709	-0.370111	0.370111	0.22709	1.13889	1.94444	2.69444	16.4899
Chol II	444.704	80	32	7	8	4	0.89	1	2	41.57	52.58	133.06	472.69	800.85	731.97	58.03	126.78	4.63	11.73	4.90	7.40	6.41	4.99	4.85	5.71	-6.67	9.62e-05	2.16e-07	-8.10	3.51e-06	7.89e-09	-6.09	3.62e-04	8.15e-07	-3.76	12.2532	12.2532	0.041891	-0.245839	181	1	0.40696	-0.44591	0.44591	0.40696	1.1875	2	2.75	16.5572
Chol II (ethyl-)	472.758	86	34	7	10	4	0.9	1	2	41.57	56.27	142.56	506.82	863.49	789.16	60.66	137.3	5.21	12.46	5.44	8.13	7.19	5.38	5.68	6.36	-7.17	3.22e-05	6.81e-08	-8.86	6.52e-07	1.38e-09	-6.87	6.39e-05	1.35e-07	-3.41	12.4298	12.4298	0.0410551	-0.231667	193	1	0.40696	-0.44591	0.44591	0.40696	1.14706	1.94118	2.67647	16.5572
Chol II (isopropyl-)	500.812	92	36	7	10	4	0.91	1	2	41.57	59.96	151.4	540.95	923	792.53	63.12	141.52	5.23	12.08	5.70	8.99	7.97	5.76	6.17	6.92	-7.88	6.56e-06	1.31e-08	-9.75	8.84e-08	1.77e-10	-6.90	6.30e-05	1.26e-07	-2.97	12.5929	12.5929	0.0298026	-0.236013	205	1	0.40696	-0.44591	0.44591	0.40696	1.11111	1.86111	2.55556	16.5572
Chol III	459.719	82	33	7	9	4	0.89	2	3	67.59	53.9	137.12	484.52	813.14	720.43	61.18	133.5	4.75	12.18	4.41	7.01	6.05	4.97	4.01	5.29	-6.45	1.64e-04	3.58e-07	-8.24	2.62e-06	5.69e-09	-5.73	8.52e-04	1.85e-06	-4.13	12.29	12.29	0.0213595	-0.271002	187	1	0.406915	-0.445911	0.445911	0.406915	1.24242	2.06061	2.81818	16.5572
Chol IV	428.705	79	31	7	7	4	0.89	1	2	32.34	51.91	131.63	463.08	784.09	714.91	75.22	122.29	6.62	9.06	4.79	7.08	6.05	5.03	5.30	5.65	-6.43	1.59e-04	3.71e-07	-7.58	1.13e-05	2.65e-08	-6.36	1.86e-04	4.34e-07	-3.89	12.796	12.796	0.188008	0.188008	175	1	0.222978	-0.354569	0.354569	0.222978	1.16129	1.96774	2.70968	16.1497
Chol IV (ethyl-)	456.759	85	33	7	9	4	0.9	1	2	32.34	55.6	141.12	498.39	845.91	767.85	81.35	131.74	6.6	9.73	5.40	7.81	6.83	5.42	6.13	6.32	-6.93	5.34e-05	1.17e-07	-8.33	2.11e-06	4.63e-09	-7.14	3.27e-05	7.16e-08	-3.54	12.9726	12.9726	0.187583	0.187583	187	1	0.222978	-0.354569	0.354569	0.222978	1.12121	1.90909	2.63636	16.1497
Chol V	442.732	82	32	7	8	4	0.9	1	2	32.34	53.76	136.49	480.83	815.09	747.38	80.13	127.5	6.72	9.13	5.16	7.44	6.44	5.22	5.71	5.99	-6.68	9.29e-05	2.10e-07	-7.95	4.96e-06	1.12e-08	-6.75	7.78e-05	1.76e-07	-3.72	12.8641	12.8641	0.194669	0.194669	181	1	0.222934	-0.355806	0.355806	0.222934	1.15625	1.96875	2.71875	16.1497
Group	SS	SS	SS	SS	TC	TC	TC	IMI	IMI	IMI	EP	EP	SS	SS	SS	SS	SS	SS	SS	LHS	LHS	LHS	LHS	LHS	LHS	LHS	LHS	LHS	LHS	LHS	LHS	LHS	LHS	LHS	LHS	EP	EP	EP	EP	EP	EP	EP	EP	EP	EP	IMI	IMI	IMI	EP
Symbol	Group
TC	Thermodynamic and conformational stability descriptors
EP	Electronic and polarizability descriptors
SS	Size, steric, and shape descriptors
IMI	Intermolecular interaction potential descriptors
LHS	Lipophilicity, hydrophilicity, and solubility descriptors
IP	Ionization and protonation state descriptors
[truncated: 111 more columns]

## Sheet: Table S4
Table S4. Nanodescriptors and hyperparameters employed to calibrate the optimal nano-QSPR models
Dataset	Model	Optimal number of nanodescriptors	Nanodescriptors	Hyperparameters
Dmix1	KNN	3	Isoelectric point charge (pH 7.4), Chi2n, fr_amide	n=3, weights=uniform
Dmix1	SVR	3	Ali Log S, EState_VSA10, EState_VSA9	C=1, ε=0.01, γ='scale', kernel=rbf
Dmix1	KwLPR	4	Hydrogen bond donor count, Chi4n, Chi4v, EState_VSA10	bandwidth=0.9, degree=1, kernel=gaussian
Dmix2	KNN	2	LogD (pH 7.4), SlogP_VSA12	n=3, weights=uniform
Dmix2	SVR	5	BCUT2D_LOGPHI, Chi3v, SlogP_VSA12, NHOHCount, NumHeteroatoms	C=1, ε=0.01, γ='scale', kernel=rbf
Dmix2	KwLPR	1	SlogP_VSA12	bandwidth=0.6, degree=1, kernel=gaussian
Dmix3	KNN	3	log Kp (cm/s), EState_VSA9, NumUnspecifiedAtomStereoCenters	n=3, weights=uniform
Dmix3	SVR	2	ESOL Log S, log Kp (cm/s)	C=1, ε=0.01, γ='scale', kernel=rbf
Dmix3	KwLPR	2	BCUT2D_LOGPLOW, SlogP_VSA12	bandwidth=0.9, degree=1, kernel=gaussian
Dmix4	KNN	5	iLOGP, Ipc, PEOE_VSA10, VSA_EState4, VSA_EState9	n=3, weights=uniform
Dmix4	SVR	5	logP, Isoelectric point charge (pH 7.4), BCUT2D_LOGPLOW, VSA_EState8, fr_Ndealkylation1	C=1, ε=0.01, γ='scale', kernel=rbf
Dmix4	KwLPR	3	Isoelectric point charge (pH 7.4), PEOE_VSA14, fr_NH1	bandwidth=0.8, degree=1, kernel=gaussian
Dmix5	KNN	5	Hydrogen bond acceptor count, log Kp (cm/s), MaxAbsEStateIndex, SlogP_VSA3, fr_ketone	n=3, weights=uniform
Dmix5	SVR	4	Silicos-IT Log P, BCUT2D_LOGPHI, VSA_EState2, VSA_EState4	C=1, ε=0.1, γ='scale', kernel=rbf
Dmix5	KwLPR	3	Silicos-IT Log P, SMR_VSA6, EState_VSA10	bandwidth=0.9, degree=1, kernel=gaussian
Dmix6	KNN	2	LogD (pH 7.4), SlogP_VSA12	n=3, weights=uniform
Dmix6	SVR	2	ESOL Log S, log Kp (cm/s)	C=1, ε=0.01, γ='scale', kernel=rbf
Dmix6	KwLPR	1	MinEStateIndex	bandwidth=0.7, degree=1, kernel=gaussian
Dmix7	KNN	3	ESOL Solubility (mg/ml), PEOE_VSA12, fr_NH1	n=5, weights=uniform
Dmix7	SVR	1	VSA_EState6	C=1, ε=0.01, γ='scale', kernel=rbf
Dmix7	KwLPR	1	VSA_EState6	bandwidth=0.8, degree=1, kernel=gaussian
Dmix8	KNN	5	Isoelectric point charge (pH 7.4), MinEStateIndex, PEOE_VSA10, SlogP_VSA12, fr_allylic_oxid	n=4, weights=uniform
Dmix8	SVR	1	SlogP_VSA12	C=1, ε=0.01, γ='scale', kernel=rbf
Dmix8	KwLPR	2	SMR_VSA4, NumUnspecifiedAtomStereoCenters	bandwidth=0.9, degree=1, kernel=gaussian

## Sheet: Table S5
Table S5. Performance of the optimal nano-QSPR models
Dataset	Model	R2	RMSEC	Q2CVloo	RMSEQCVloo	Q2Ext	RMSEExt
Dmix1	KNN	0.934521	9.15067	0.832234	14.6471	0.875586	11.1083
Dmix1	SVR	0.915155	10.4163	0.863418	13.2159	0.890281	10.4317
Dmix1	KwLPR	0.983809	4.55031	0.886687	12.0376	0.850075	12.1942
Dmix2	KNN	0.873887	12.6994	0.777175	16.8804	0.834483	20.6305
Dmix2	SVR	0.894838	11.5966	0.807931	15.6722	0.851945	12.1179
Dmix2	KwLPR	0.76445	17.36	0.683091	20.13	0.59727	19.99
Dmix3	KNN	0.779047	16.8094	0.577807	23.2358	0.937597	7.86715
Dmix3	SVR	0.881842	12.2923	0.816679	15.3111	0.802582	20.0565
Dmix3	KwLPR	0.633379	21.6526	0.529159	24.538	0.937334	19.1507
Dmix4	KNN	0.91932	10.1575	0.876409	12.5717	0.853693	12.0461
Dmix4	SVR	0.990105	3.55726	0.917382	10.2787	0.85107	12.1537
Dmix4	KwLPR	0.983437	4.60232	0.922954	9.92605	0.913747	9.24916
Dmix5	KNN	0.923102	9.91648	0.818107	15.2514	0.900989	9.90961
Dmix5	SVR	0.888181	11.958	0.818702	15.2264	0.877793	11.0094
Dmix5	KwLPR	0.936557	9.00726	0.808929	15.6314	0.906194	9.64563
Dmix6	KNN	0.953304	7.72756	0.876693	12.5573	0.848438	12.8126
Dmix6	SVR	0.623571	21.9403	0.515211	24.8988	0.594417	20.545
Dmix6	KwLPR	0.604658	22.4847	0.516094	24.8761	0.665631	18.2108
Dmix7	KNN	0.757001	17.628	0.640675	21.4361	0.532785	21.5265
Dmix7	SVR	0.485649	25.6467	0.432021	26.9505	0.618636	19.4484
Dmix7	KwLPR	0.429461	27.0112	0.334194	29.1793	0	100.708
Dmix8	KNN	0.624989	21.899	0.45112	26.4935	0.327715	25.8221
Dmix8	SVR	0.238354	31.2089	0.146881	33.0298	-0.116544	33.2777
Dmix8	KwLPR	0.323314	29.4168	0.236638	31.244	0.692565	29.5029
